1 **Dopamine transporter and synaptic vesicle sorting defects initiate auxilin-linked**  
2 **Parkinson's disease**

3 Vidyadhara D J<sup>1,2</sup>, Mahalakshmi Somayaji<sup>3,4</sup>, Nigel Wade<sup>1,2</sup>, Betül Yücel<sup>1,2</sup>, Helen Zhao<sup>2</sup>,  
4 Shashaank N<sup>5,6</sup>, Joseph Ribaud<sup>2</sup>, Jyoti Gupta<sup>2</sup>, TuKiet T. Lam<sup>7</sup>, Dalibor Sames<sup>8</sup>, Lois E.  
5 Greene<sup>9</sup>, David L. Sulzer<sup>3,4,10,11</sup>, and Sreeganga S. Chandra<sup>1,2,11,12,\*</sup>

6 <sup>1</sup>Departments of Neurology and <sup>2</sup>Neuroscience, Yale University, CT, USA

7 <sup>3</sup>Department of Psychiatry, Columbia University, NY, USA

8 <sup>4</sup>Division of Molecular Therapeutics, New York State Psychiatric Institute, NY, USA

9 <sup>5</sup>Department of Computer Science, Columbia University, NY, USA

10 <sup>6</sup>New York Genome Center, NY, USA

11 <sup>7</sup>W. M. Keck Foundation Biotechnology Resource Laboratory, Yale University, CT, USA

12 <sup>8</sup>Department of Chemistry and NeuroTechnology Center, Columbia University, NY, USA

13 <sup>9</sup>Laboratory of Cell Biology, NHLBI, National Institutes of Health, MD, USA

14 <sup>10</sup>Departments of Neurology and Pharmacology, Columbia University, NY, USA

15 <sup>11</sup>Aligning Science Across Parkinson's (ASAP) Collaborative Research Network, Chevy Chase,  
16 MD, USA

17 <sup>12</sup>Program in Cellular Neuroscience, Neurodegeneration and Repair, Yale University, CT, USA

18  
19  
20 \* Corresponding Author

21 Contact Information: [sreeganga.chandra@yale.edu](mailto:sreeganga.chandra@yale.edu); Ph: +1-203-785-6172

22  
23  
24  
25  
26  
27  
28  
29  
30

31 **ABBREVIATIONS:**

32 3-MT: 3-Methoxytyramine  
33 5-HIAA: 5-hydroxyindoleacetic acid  
34 ACSF: Artificial cerebrospinal fluid  
35 ALDH7A1: Aldehyde dehydrogenase 7A1  
36 BSA: Bovine serum albumin  
37 CCVs: Clathrin coated vesicles  
38 CME: Clathrin mediated endocytosis  
39 COMT: Catechol-o-methyltransferase  
40 DA: Dopaminergic  
41 DAT: Dopamine transporter  
42 DOPAC: 3,4-dihydroxyphenylacetic acid  
43 EM: Electron Microscopy  
44 FSCV: Fast scan cyclic voltammetry  
45 GAK: Cyclin G-associated kinase  
46 GFAP: Glial fibrillary acidic protein  
47 HPLC: High performance liquid chromatography  
48 HVA: Homovanillic acid  
49 Iba1: Ionized calcium-binding adapter molecule 1  
50 IPA: Ingenuity Pathway Analysis  
51 KO: Knockout  
52 RME-8: Receptor-mediated endocytosis 8  
53 SNG: Synaptogyrin  
54 SNpc: Substantia nigra pars compacta  
55 SEM: Standard error of the mean  
56 SV: Synaptic vesicle  
57 SV2: Synaptic vesicle glycoprotein 2  
58 SYP: Synaptophysin  
59 Syn: Synuclein  
60 SYT: Synaptotagmin I  
61 TH: Tyrosine hydroxylase  
62 VGAT: Vesicular GABA transporter  
63 VGLUT: Vesicular glutamate transporters  
64 VMAT2: Vesicular monoamine transporter-2  
65 VTA: Ventral tegmental area  
66 WT: Wildtype

67

68

69

70

71

72 **SUMMARY:**

73 Auxilin participates in the uncoating of clathrin-coated vesicles (CCVs), thereby facilitating  
74 synaptic vesicle (SV) regeneration at presynaptic sites. Auxilin (*DNAJC6/PARK19*) loss-of-  
75 function mutations cause early-onset Parkinson's disease (PD). Here, we utilized auxilin-knockout  
76 (KO) mice to elucidate the mechanisms through which auxilin deficiency and clathrin-uncoating  
77 deficits lead to PD. We demonstrate that auxilin KO mice display the cardinal features of PD,  
78 including progressive motor deficits,  $\alpha$ -synuclein pathology, nigral dopaminergic loss, and  
79 neuroinflammation. Through unbiased proteomic and neurochemical analyses, we demonstrate  
80 that dopamine homeostasis is disrupted in auxilin KO brains, including via slower dopamine  
81 reuptake kinetics *in vivo*, an effect associated with dopamine transporter misrouting into axonal  
82 membrane deformities in the dorsal striatum. We also show that elevated macroautophagy and  
83 defective SV protein sorting contribute to ineffective dopamine sequestration and homeostasis,  
84 ultimately leading to neurodegeneration. This study advances our knowledge of how presynaptic  
85 endocytosis deficits lead to dopaminergic vulnerability and pathogenesis of PD.

86

87 **KEYWORDS:**

88 Clathrin mediated endocytosis, Dopamine,  $\alpha$ -Synuclein, Lewy bodies, Axonal deformity, Synaptic  
89 autophagy, Clathrin coated vesicles, Endolysosomal system, Dorsal striatum, Substantia nigra

90 **INTRODUCTION:**

91 Presynaptic boutons of dopaminergic (DA) nigrostriatal neurons are sites of initiation for  
92 neurodegeneration in PD (Kordower et al., 2013). Nigrostriatal DA neurons possess long,  
93 hyperbranched axons as well as tonic firing properties that make them reliant on efficient synaptic  
94 vesicle (SV) recycling to maintain a steady state SV pool for neurotransmission (Vidyadhara et  
95 al., 2019). In presynaptic sites, SV recycling is supported by several endocytic pathways, including  
96 clathrin mediated endocytosis (CME), ultra-fast endocytosis, and bulk endocytosis (Chanaday et  
97 al., 2019). Clathrin coated vesicles (CCVs) are a common intermediate of these pathways. CCVs  
98 are uncoated by the coordinated action of auxilin (*DNAJC6*) or its ubiquitous homolog cyclin G-  
99 associated kinase (*GAK*), synaptojanin-1 (*SNJI*), and endophilin-A1 (*ENDOAI*) with the  
100 chaperone Hsc70. Interestingly, mutations in all four genes (*DNAJC6*, *GAK*, *SNJI*, *ENDOAI*) have

101 been identified as causal or risk alleles for PD/parkinsonism, suggesting a major role for altered  
102 clathrin uncoating in the initiation of DA presynaptic site degeneration and pathogenesis of both  
103 familial and sporadic PD (Vidyadhara et al., 2019). Animal models carrying these mutations also  
104 show clathrin uncoating and presynaptic endocytosis defects (Cao et al., 2017; Song et al., 2017;  
105 Yoshida et al., 2018), however, how these disturbances result in characteristics of PD is unclear.

106 Auxilin is a brain-specific heat shock protein 40 family co-chaperone that functions to uncoat  
107 CCVs to nascent SVs by recruiting Hsc70 (Fotin et al., 2004; Ungewickell et al., 1995). Unlike  
108 other co-chaperones, auxilin has a limited number of substrates (Roosen et al., 2021) and only one  
109 described function. Loss-of-function, autosomal recessive mutations of the auxilin gene (*PARK19*)  
110 cause juvenile, early-onset PD (Edvardson et al., 2012; Elsayed et al., 2016; Koroğlu et al., 2013;  
111 Mittal, 2020; Ng et al., 2020; Olgiati et al., 2016; Ray et al., 2021). A recent study also shows  
112 *PARK19* mutations in late-onset PD (Gialluisi et al., 2021). *In vivo* presynaptic dopamine  
113 transporter (DAT) imaging on a *PARK19* patient revealed DA terminal loss, which supports a  
114 parkinsonism diagnosis and suggests that clathrin uncoating deficits impact DA presynaptic sites  
115 (Ng et al., 2020). Furthermore, LRRK2 mutations, a common genetic cause for PD, may exert  
116 some of its pathological actions through auxilin. In LRRK2 patient induced pluripotent stem cell  
117 derived DA neurons, LRRK2 phosphorylation of auxilin led to decreased auxilin levels and  
118 clathrin binding, resulting in accumulation of oxidized-dopamine and  $\alpha$ -synuclein overexpression  
119 (Nguyen and Krainc, 2018). Whether loss-of-function mutations in auxilin can also trigger PD  
120 through these mechanisms is unknown. Nonetheless, these newfound links between auxilin and  
121 LRRK2 implicate a role for auxilin in both familial and sporadic PD. The relevance of auxilin to  
122 all forms of PD is underscored by the finding that GAK (*DNAJC26*) is a risk allele for sporadic  
123 PD (Nalls et al., 2014).

124 Prior to the discovery of auxilin *PARK19* mutations, auxilin knockout (KO) mice were generated  
125 and characterized for CME deficits (Yim et al., 2010). Analysis of synapses in deep cerebellar  
126 nuclei of adult auxilin KO mice revealed accumulation of CCVs and empty clathrin cages (lacking  
127 SV membrane). Similar ultrastructural alterations were seen *in vitro* in primary cortical and  
128 hippocampal neurons and were accompanied by defective SV endocytosis (Yim et al., 2010).  
129 These findings confirmed that auxilin functions in clathrin uncoating *in vivo*. To determine how a  
130 primary deficit in clathrin uncoating that occurs in all neuronal types lead to selective vulnerability

131 of DA neurons in PD, we characterized auxilin KO mice for age-dependent nigrostriatal  
132 degenerative changes and investigated the underlying mechanisms. Here, we demonstrate that  
133 cytoplasmic dopamine accumulation, DAT mis-trafficking, SV sorting deficits and autophagic  
134 overload in dorsal striatal DA presynaptic sites of auxilin KO mice initiate behavioral and  
135 histochemical signatures of PD.

## 136 **RESULTS:**

137 **Auxilin KO mice develop age-dependent PD-like behavioral abnormalities:** We performed a  
138 battery of behavioral assays to evaluate if auxilin KO mice develop age-dependent motor behavior  
139 abnormalities akin to PD patients. We monitored cohorts of wildtype (WT, C57BL/6J) and auxilin  
140 KO (congenic B6.-*Dnajc6*<sup>tm1Legr</sup>) mice longitudinally, assessing behavior at 3, 6, 9, 12, and 15  
141 months of age. Locomotion and ambulatory behaviors were evaluated by the open field test.  
142 Auxilin KO mice behave like WT mice at 3 months of age but show a significant age-dependent  
143 decrease in overall distance travelled, starting at 9 months (Figure. 1a, b). Next, we tested the same  
144 cohorts on the balance beam test to evaluate motor coordination. We assessed the ability of mice  
145 to traverse a raised narrow beam by measuring the time taken to cross (Figure. 1c) and the number  
146 of runs performed in 1 minute (Figure. 1d). The performance of auxilin KOs was comparable to  
147 WT controls at 3 months (Figure. 1c, d), whereas it deteriorated in auxilin KOs at a later age with  
148 a significant deficit emerging at 9 months (Figure. 1c, d, Video 1). These results suggest that  
149 auxilin KOs appear to be normal at 3 months, whereas they become symptomatic by 9 months,  
150 exhibiting a progressive decrement in motor function at later ages. There was no difference in body  
151 weight between genotypes (Supplementary Figure. 1g). Furthermore, performance on the Rotarod  
152 and grip strength in auxilin KOs were comparable to that of WT (Supplementary Figure. 1a, e, f).  
153 In addition, auxilin KO mice do not exhibit anxiety-like behavior as evaluated by time spent in the  
154 inner and outer circle of an open field apparatus (Supplementary Figure. 1b, c), and by fecal pellet  
155 expulsion (Supplementary Figure. 1d). Together, these observations suggest that auxilin KO mice  
156 develop age-dependent, progressive motor deficits, consistent with *PARK19* and PD patients.

157 **Aged auxilin KO mice faithfully replicate cardinal histopathological signatures of PD:** Motor  
158 symptoms in PD manifest due to the degeneration of DA neurons in the substantia nigra pars  
159 compacta (SNpc) when DA loss reaches a threshold of 40-50% (Poewe et al., 2017). We performed  
160 stereological quantitation of SNpc DA neurons, that are immunoreactive to tyrosine hydroxylase

161 (TH), in WT and auxilin KO mice to understand the cellular basis for the motor symptoms we observed.  
162 No change in DA neuron numbers was seen in auxilin KO mice at 3 months (Figure. 1e, f).  
163 However, at the symptomatic age of 9 months, a significant loss of DA neurons was observed  
164 (~40%) (Figure. 1e, f), which did not increase further at 15 months (Supplementary Figure. 1h, i).  
165 Neuronal loss was distributed throughout the SNpc (Figure. 1e, arrows), as observed in models of  
166  $\alpha$ -synuclein overexpression (Chen et al., 2015) and vesicular dopamine storage deficits (Caudle et  
167 al., 2007), but unlike the ventrolateral loss seen in neurotoxic models (Vidyadhara et al., 2017). In  
168 addition, loss of DA neurons appears to be restricted to SNpc, as ventral tegmental area (VTA) TH  
169 expression and TH+ve neuron numbers were unchanged with age (Supplementary Figure. 2a-c),  
170 as in PD patients.

171 To assess if neurodegeneration was accompanied by neuroinflammation, we immunostained for  
172 glial fibrillary acidic protein (GFAP), an astroglial marker, and ionized calcium-binding adapter  
173 molecule 1 (Iba1), a microglial marker (Figure. 2a). At 3 months, the number of astroglia and  
174 microglia in the SNpc of auxilin KO mice were comparable to WT, whereas at 9 months, significant  
175 astrogliosis and microgliosis was seen in auxilin KO mice (Figure. 2a-c).

176 Next, we tested if auxilin KO brains exhibit  $\alpha$ -synuclein pathology, a hallmark of PD (Poewe et  
177 al., 2017). Strikingly, auxilin KO brains showed age-dependent  $\alpha$ -synuclein pathology.  
178 Phosphorylated and aggregated  $\alpha$ -synuclein as determined by pSer129- $\alpha$ -synuclein  
179 immunostaining was seen in the TH+ve SNpc at 9 months, but not at 3 months of age in auxilin  
180 KO mice (Figure. 2d, e). Immunostaining also revealed a moderate decrease in TH expression at 3  
181 months, with no significant change at 9 months of age in auxilin KO mice (Figure. 2d, f). The pSer129-  
182  $\alpha$ -synuclein pathology was also seen in the VTA at 9 months of age, but the expression did not  
183 reach significance (Supplementary Figure. 2a, c). These compelling data demonstrate that auxilin  
184 KO mice develop typical age-related parkinsonian pathology. Auxilin KO mice are thus a reliable and  
185 robust model for PD.

186 **Proteomic analysis of auxilin KO mice brains implicate defective dopamine degradation:** To  
187 gain unbiased insights into the consequences of auxilin loss-of-function, we performed proteomic  
188 analysis on whole brain and synaptosomes fractions from 3-month-old, WT and auxilin KO mice  
189 by label-free quantification mass spectrometry (LFQ-MS). WT and auxilin KO brains  
190 (n=3/genotype) were analyzed in technical triplicates. We detected a total of 2851 proteins in the

191 whole brain proteome, 22 of which were significantly changed in KO samples (Figure. 3a, b;  
192 Supplementary Table 1). We observed an expected decrease in auxilin levels and a compensatory  
193 increase in the auxilin homolog GAK, as previously published (Yim et al., 2010). Many of the  
194 prominent proteins whose levels are changed are linked to PD and neurodegeneration, including  
195 RAB3B, TBCD, ACAP2, HEBP1, WDFY1 and NNTM which are decreased, while CRYAB,  
196 PRIO, and NMRL1 are increased in auxilin KO brains (Figure. 3a, b; Supplementary Table 1).  
197 Notably, we did not identify any altered Golgi resident or trafficking proteins in auxilin KO brains.  
198 Ingenuity Pathway Analysis (IPA) revealed that the top pathways were highly overlapping and  
199 involve in the degradation of lysine and degradation of choline and monoaminergic  
200 neurotransmitters, including dopamine (Figure. 3c, d). Interestingly, a decrease in AL7A1 appears  
201 to drive the top canonical pathways (Figure. 3c). AL7A1 or aldehyde dehydrogenase 7A1  
202 (ALDH7A1) is a multifunctional enzyme which plays crucial role in detoxification of reactive  
203 aldehydes and oxygen species that are generated during monoaminergic neurotransmitter  
204 metabolism (Brocker et al., 2011). Aldehydes that accumulate due to ALDH7A1 loss-of-function  
205 hinder dopamine synthesis (Clayton, 2020).

206 Proteomic analysis of synaptosomal fractions identified 3124 proteins, 24 of which were  
207 significantly dysregulated (Figure. 3e, f; Supplementary Table 2). Along with the expected  
208 downregulation of auxilin, KO mice showed decreased AL7A1, NNTM and WDFY1, and an  
209 upregulation in PURA2 and MTND, proteins which were also significantly changed in whole brain  
210 proteomic experiments (Figure. 3a, b). Three neurofilaments NFL, NFH, and AINX were  
211 upregulated and are candidate biomarkers for axonal damage in PD (Bäckström et al., 2020). A  
212 crucial dopamine metabolizing enzyme COMT (Myöhänen et al., 2010) (catechol-o-  
213 methyltransferase) was also significantly decreased in synaptosome preparations of auxilin KOs.  
214 HTRA1, PP2A, KCNJ4 and APC were a few PD-linked proteins that were also dysregulated  
215 (Figure. 3e, f; Supplementary table 2). In all, we find alterations in a high number of proteins  
216 linked to PD (13/23), including key dopamine metabolism enzymes. As the synaptosome  
217 preparations were purified from whole brain, these findings strongly suggests that loss-of-auxilin  
218 selectively impacts DA neurons. This is also evident from the IPA analysis, where the top affected  
219 pathways are related to dopamine degradation (Figure. 3g, h). A high fraction of the canonical  
220 pathways predicted for the whole brain analysis were replicated in IPA analysis for the

221 synaptosome samples (10/21, compare Figure. 3g, h with 3c, d), suggesting a major impact on the  
222 function of DA synapses upon loss-of-auxilin.

223 To evaluate if the disruption in dopamine degradation predicted by the proteomic analysis of young  
224 auxilin KO brains (Figure. 3) leads to activation of downstream neurodegenerative pathways at an  
225 older age, we performed LFQ-MS on synaptosomes from 9-month-old auxilin KO mice. In this  
226 preparation, we still observed a compensatory increase in GAK in auxilin KO brains. NFL, AINX,  
227 and CADH2 were also upregulated as in the 3-month data set, reinforcing their potential as biofluid  
228 biomarkers of PD (Bäckström et al., 2020) (Supplementary Figure. 3a, b). Along with the expected  
229 downregulation of auxilin, mTOR, a key cell survival protein and an autophagy regulator which  
230 helps maintain striatal DA projections (Kosillo et al., 2019) and linked to PD (Querfurth and Lee,  
231 2021), was decreased in auxilin KO mice. RGS6, a critical regulator of dopamine feedback  
232 signaling in nigrostriatal DA neurons and a modulator of PD pathology (Ahlers-Dannen et al.,  
233 2020) was also downregulated (Supplementary Figure. 3a, b; Supplementary table 4). IPA revealed  
234 highly overlapping autophagic pathways such as ILK, P13K/AKT, mTOR, and AMPK signaling,  
235 along with oxidative stress, DA signaling, and ubiquitination pathway as dysregulated in auxilin  
236 KOs at 9 months (Supplementary Figure. 3c), which are directly linked to neurodegeneration in  
237 PD (Poewe et al., 2017). Together, our proteomic analyses suggests that dysfunction of dopamine  
238 homeostasis in presynaptic sites is likely to be an early pathogenic event in auxilin-linked PD.

239 **Disrupted striatal dopamine homeostasis in auxilin KO mice:** To directly monitor dopamine  
240 homeostasis, we measured the levels of dopamine and its metabolites in dorsal striatum of WT and  
241 auxilin KO mice using high performance liquid chromatography (HPLC). Dopamine levels were  
242 moderately decreased (14.5%) at 3 months in auxilin KO mice compared to WT controls, whereas  
243 loss was more pronounced at 9 months of age (52%, Figure. 4a) when motor deficits are seen  
244 (Figure. 1). We also measured serotonin levels, which were unchanged in auxilin KOs  
245 (Supplementary Figure. 4a). Next, we evaluated the levels of dopamine metabolites 3,4-  
246 dihydroxyphenylacetic acid (DOPAC) and homovanillic acid (HVA), which are intra- and extra-  
247 cellular metabolites, respectively (Figure. 4e). Interestingly, DOPAC levels were significantly  
248 increased at 3 months (42%, Figure. 4b), even though dopamine levels are modestly decreased.  
249 DOPAC is a catabolite of cytosolic (non-vesicular) dopamine (Figure. 4e). Upregulation of  
250 DOPAC suggests cytosolic dopamine accumulation (Karoum et al., 1994), which is known to be



251 toxic, leading to oxidative stress and proteostasis deficits which culminate in neurodegeneration  
252 in both familial and sporadic models of PD (Masato et al., 2019). 3-Methoxytyramine (3-MT) is a  
253 dopamine metabolite, formed by direct catabolism of unused dopamine in the synaptic-cleft by  
254 COMT (Myöhänen et al., 2010) (Figure. 4e). 3-MT levels were significantly lower in auxilin KO  
255 (Figure. 4c) suggestive of a decrease in dopamine release (Waldmeier et al., 1981), and reflective  
256 of the downregulation of COMT seen in the proteomics data (Figure. 3e, f). Both DOPAC and 3-  
257 MT are metabolized further to HVA outside the DA termini (Figure. 4e), whose level did not  
258 change at 3 months in auxilin KO (Figure. 4d). This is possibly due to a balancing out of HVA  
259 levels attained by increased DOPAC and decreased 3-MT levels. At 9 months when motor  
260 abnormalities are apparent, both 3-MT and HVA levels were significantly decreased in auxilin KO  
261 mice (Figure. 4c, d), which is also the case in PD patients. Indeed, decreased HVA levels have  
262 also been observed in the cerebrospinal fluid of patients with auxilin mutations (Ng et al., 2020).  
263 DOPAC levels were unchanged at 9 months. Levels of the serotonin metabolite 5-  
264 hydroxyindoleacetic acid (5-HIAA) did not change at 3 and 9 months (Supplementary Figure. 4b),  
265 suggesting dopamine-selective dysfunction. Overall, assessment of dopamine and its metabolites  
266 in dorsal striatum support the premise that dopamine homeostasis is altered in auxilin KO mice.

267 **Dopamine reuptake is dysfunctional in young auxilin KO mice:** Extracellular dopamine in the  
268 striatum is pumped back into DA axons by the dopamine transporter (DAT). Therefore, DAT  
269 controls the level of presynaptically available dopamine and is a key regulator of dopamine  
270 compartmentalization and homeostasis (Bu et al., 2021). DAT KO mice show a decreased striatal  
271 dopamine levels and release (Jones et al., 1998). We evaluated extracellular dopamine clearance  
272 on a sub-second timescale in the dorsal striatum of auxilin KO using fast scan cyclic voltammetry  
273 (FSCV) *in vivo*. The SNpc was stimulated using a 30 pulses of 50-Hz stimuli (0.6 sec) paradigm  
274 that drives burst firing by nigral DA neurons. This causes dopamine build-up in the extracellular  
275 space at levels sufficient to saturate DAT and to be detected by the carbon fiber electrode placed  
276 in the dorsal striatum (Somayaji et al., 2020) (Figure. 4f, Supplementary Figure 5a). Figure. 4g  
277 and Supplementary Figure. 5b depict the time course of evoked dopamine release and its clearance  
278 in the dorsal striatum, along with the characteristic background-subtracted voltammogram at the  
279 maximum oxidation peak for WT and auxilin KO mice. Surprisingly, evoked dopamine release  
280 was not significantly different between WT and auxilin KO (Figure. 4h). Interestingly, dopamine  
281 reuptake kinetics as measured by the time taken to clear 50% of the dopamine from its peak levels

282 ( $t_{1/2}$ ) was significantly delayed in auxilin KO mice (Figure. 4i), suggesting a deficit in DAT  
283 function.

284 To further analyze the difference in dopamine reuptake kinetics, we used a novel computational  
285 model of dopamine release derived from previous studies (Venton et al., 2003; Walters et al., 2014)  
286 to fit averaged FSCV traces from WT and auxilin KO mice. We found that the wider dopamine  
287 peak from auxilin KO mice can be closely fit by a ~60% reduction in DAT activity (parameter  $V_m$ )  
288 and a ~45% reduction in dopamine release per electrical pulse (parameter  $[DA]_p$ ) compared to WT  
289 mice ( $V_m = 3.3$  in auxilin KO vs  $8.0 \mu\text{M/s}$  in WT,  $[DA]_p = 0.333$  in auxilin KO vs  $0.6 \mu\text{M/mA}$  in  
290 WT), while holding all other major parameters constant (Figure. 4j, Supplementary Figure. 5c).  
291 While DAT deficiency seen here was consistent with our FSCV recordings, the decrease in  
292 dopamine release in auxilin KOs in the computational model deviated from FSCV observations  
293 (Figure. 4h). However, decreased neurotransmitter release is expected in auxilin KOs as these mice  
294 have previously been shown to have SV recycling defects (Yim et al., 2010). Our neurochemical  
295 analyses show a decrease in the extracellular dopamine metabolite 3-MT (Figure. 4c) in the dorsal  
296 striatum of auxilin KO which also indicate dopamine release defects. Thus, it appears that a larger  
297 decrease in DAT activity is masking a decrease in dopamine release and can account for the  
298 minimal difference in total evoked dopamine release observed between WT and auxilin KO mice  
299 in the FSCV recordings.

300 **Auxilin KO mice exhibit DAT deformities in the dorsolateral striatum:** To visualize DAT in  
301 auxilin KO mice, we performed immunohistochemistry for DAT, co-labeling with the presynaptic  
302 SV protein synaptogyrin-3 in dorsal striatum (Figure. 5a). We found large DAT+ve structures (6-  
303  $8 \mu\text{m}$ ) in the dorsal striatum, but not in the ventral striatum of auxilin KO brains (Figure. 5a-c,  
304 Supplementary Figure. 6a), like structures that have been described in synaptojanin-1 knock-in  
305 mice (Cao et al., 2017). These structures were absent in WT, but ubiquitous in the dorsolateral  
306 striatum of auxilin KOs, localizing both with presynaptic sites (Figure. 5a, enlarged, arrowhead)  
307 and closer to the soma (as marked by DAPI) (Figure 5a, enlarged, arrows, Supplementary Figure.  
308 6b). These DAT+ve structures were noted in auxilin KOs at both 3 and 9 months of age, though  
309 they were significantly higher (~40%) at the earlier time point (Figure. 5b). Synaptogyrin-3, which  
310 marks presynaptic termini and a known interactor of DAT, did not exhibit a change in distribution  
311 or expression level (Figure. 5a, Supplementary Figure. 7f). Glutamatergic and GABAergic termini,

312 which were imaged by staining for vesicular glutamate transporters (VGLUT1) and vesicular  
313 GABA transporter (VGAT), respectively, did not exhibit such structures (Supplementary Figure.  
314 7a-c). As DAT is typically localized to DA axonal projections (Block et al., 2015), these  
315 observations suggest that the large DAT+ve structures seen at the dorsal striatum of auxilin KO  
316 may be DA axonal membrane deformities.

317 To confirm that the DAT+ve structures are membrane-bound and surface accessible, we performed  
318 *ex vivo* imaging using the membrane DAT ligand dichloropane which binds to cell surface DAT  
319 preferentially from the extracellular side. Dichloropane was conjugated with rhodamine red-X, as  
320 described previously (Fiala et al., 2020) to obtain the dichloropane–rhodamine red-X probe (Fiala  
321 et al., 2020). Fresh striatal slices were incubated in artificial cerebrospinal fluid (ACSF) containing  
322 dichloropane probe (100 nM, 45 mins) and imaged for membrane-bound DAT. The number of  
323 small dichloropane-DAT+ve punctum that represent DA terminal varicosities in the dorsal  
324 striatum were not altered in auxilin KOs at 3 months of age (Figure. 5d, f). However, auxilin KOs  
325 revealed large dichloropane-DAT+ve structures (Figure. 5d, e, arrows) similar to those in the  
326 dorsal striatum of fixed brains, suggesting that the DAT structures are membrane accessible. Next,  
327 we performed an ultrastructure evaluation of dorsal striatum by electron microscopy (EM), which  
328 revealed multilayered axonal whirls in auxilin KO brains (Figure. 5g, Supplementary Figure. 8a,  
329 arrows). Additionally, there were early autophagic vacuole-like structures close to these axonal  
330 deformities (Figure. 5g, arrow heads). We performed immunogold labeling of DAT in the dorsal  
331 striatum, which revealed a uniform distribution of DAT-immunogold particles in WT, denoting  
332 DA axonal projections and presynaptic sites (Figure. 5h). In contrast, DAT-immunogold clusters  
333 were observed in auxilin KOs (Figure. 5h, arrows, Supplementary Figure. 8b, arrows), indicative  
334 of axonal membrane deformities of DA projections. Collectively, these observations suggest that  
335 DAT is mis-trafficked and trapped in large axonal deformities, which hinder DAT function in  
336 dopamine reuptake.

337 **Increased presynaptic autophagy in auxilin KO mice clear CCVs:** We evaluated the  
338 distribution pattern of endocytic partners of auxilin in the dorsal striatum by  
339 immunohistochemistry. Previous confocal imaging has shown that endocytic proteins have a  
340 clustered appearance in auxilin KO primary cortical neurons (Yim et al., 2010), mainly reflective  
341 of accumulation of CCVs and clathrin cages. We stained for clathrin, and unexpectedly saw that

342 neither the clathrin intensity nor the distribution pattern was altered in the dorsal striatum of young  
343 auxilin KO mice (Figure. 6a, b). Hsc70, the chaperone partner of auxilin, and endophilin-A1,  
344 another key endocytic protein required for uncoating also did not change significantly both in  
345 expression (Figure. 6a, d) or distribution (Figure. 6a, e) in auxilin KO mice striatum at 3 months.  
346 These observations remained true even at 9 months, except for endophilin-A1 which was  
347 significantly upregulated in auxilin KOs (Figure. 6a, c). We assessed the interaction of clathrin  
348 with Hsc70 and endophilin-A1 by their co-localization and determined it was not altered in auxilin  
349 KOs (Figure. 6a, f, g). Overall, there are no major changes in endocytic protein composition and  
350 distribution in young auxilin KO mice, in line with our synaptosomal proteomic experiments  
351 (Figure. 3e-h).

352 To confirm our immunohistochemistry findings, we performed EM of the dorsal striatum of 3-  
353 month-old WT and auxilin KO mice and quantitated the number of CCVs and SVs per synapse.  
354 We quantified these organelles in both asymmetric or Type I synapses which are predominantly  
355 glutamatergic (Figure. 6h), and symmetric or Type II synapses which are known to be DA or  
356 GABAergic in this brain region (Harris and Weinberg, 2012) (Figure. 6i). The number of CCVs  
357 in Type I synapses showed a moderate increase in auxilin KOs (~10%, Supplementary Figure. 9b).  
358 Increase in CCV numbers were more pronounced in Type II synapses of auxilin KO mice (~27%,  
359 Supplementary Figure. 9c). No notable difference between WT and auxilin KO were found in SVs  
360 number in both Type I and II synapses (Supplementary Figure. 9d, e). Cumulative effect of this  
361 was seen in CCV/SV ratio, which showed a modest but significant increase only in Type II  
362 synapses (Figure. 6k) but not in Type I synapses (Figure. 6j). It is worth noting that the distribution  
363 of CCVs and SVs was variable within the Type II synapses of auxilin KOs (Compare Figure. 6i  
364 and Supplementary Figure. 9a). Overall, these results are in consistent with our  
365 immunohistochemistry which did not show notable difference in clathrin distribution (Figure.  
366 6a,b), and previous findings on cerebellar presynapses of auxilin KO mice (Yim et al., 2010).

367 The lack of a significant CCV accumulation in dorsal striatum was puzzling. To investigate  
368 whether CCVs and clathrin cages were being cleared by autophagy as suggested by several recent  
369 papers (Binotti et al., 2015; Yang et al., 2022), we examined the electron micrographs of WT and  
370 auxilin KO dorsal striatal presynapses for double membraned synaptic autophagosomes (Figure.  
371 6l). The number of autophagosomes per synaptic site was significantly higher in auxilin KOs

372 compared to WT (Figure 6l, m). Both Type I and II synapses showed an enhanced number of  
373 autophagosomes, though Type II synapses revealed a relatively greater number (Supplementary  
374 Figure. 8f, g). Furthermore, we find several examples of autophagosomes, in the Type II synapses,  
375 containing CCVs and SVs as their cargo (Figure. 6l, arrowheads). This unexpected finding  
376 suggests that CCVs are cleared by presynaptic macroautophagy in auxilin KO mice. These  
377 observations also support our IPA analyses of the 9-month synaptosomal proteomics data which  
378 suggested activation of macroautophagy-related pathways (Supplementary Figure. 3c).

379 **CCVs proteomics in auxilin KO mice suggest SV sorting defects:** To understand the impact of  
380 loss of auxilin on SV sorting and composition, we performed EM and proteomic analysis of CCVs  
381 purified from brains of WT and auxilin KO mice (age: 3 months)(Blondeau et al., 2004). EM of  
382 the CCV preparations revealed that they contain both CCVs (arrows) and clathrin cages  
383 (arrowhead) but lack other organelles such as SVs (Figure. 7a) (Vargas et al., 2014). Auxilin KO  
384 mice displayed clathrin structures (CCVs + clathrin cages) which were significantly smaller in size  
385 compared to WT (Figure. 7a, b). This is in part because there was a larger proportion of clathrin  
386 cages in auxilin KOs (Figure. 7a, c), consistent with previously published findings (Yim et al.,  
387 2010).

388 LFQ-MS of CCVs revealed 891 proteins common to three independent experiments, 49 of which  
389 were significantly changed, with the majority being downregulated (38 down, 13 upregulated,  
390 Supplementary Table 3). Strikingly, all the proteins that exhibit decreased levels were SV  
391 transmembrane proteins (Takamori et al., 2006; Taoufiq et al., 2020), such as SNG 1 and 2, SYP,  
392 SYT 1 and 12, SV2-A and -B (Figure. 7d, e). VGLUT1 and VGLUT2, vesicular transporters for  
393 the excitatory neurotransmitter glutamate were decreased (Figure. 7d, e). Vesicular zinc  
394 transporters such as ZNT3 and TM163 were also decreased (Figure. 7d, e). By extension, this  
395 suggests that vesicular monoamine transporter-2 (VMAT2) may also be decreased, which was not  
396 detected by LFQ-MS, due to its low abundance (Taoufiq et al., 2020). IPA analysis of the CCV  
397 proteomics revealed dysregulation in the CME pathway in auxilin KO mice (Figure. 7f).

398 To rule out the possibility that the downregulation of certain SV transmembrane proteins seen in  
399 the auxilin KO CCV proteomics was due to the presence of clathrin cages, we compared our CCVs  
400 proteomics data with published SV proteomics data (Takamori et al., 2006). We find that the levels  
401 of synapsins, SCAMPs, syntaxins, SNAPs and several others which are categorized as SV

402 trafficking proteins were unchanged. Endocytic proteins such as dynamins, flotilins, RAB proteins,  
403 endophilin-A1, synaptojanin-1, that are peripherally associated with the SV membrane were also  
404 unchanged in auxilin KO CCVs compared to WT (data not shown). These observations indicate  
405 that the decrease in certain SV transmembrane proteins in auxilin KO mice is likely not an artifact  
406 due to the presence of empty clathrin cages. Overall, these results suggest SV sorting defects  
407 congruent with recently proposed roles for auxilin in endocytic proof reading (Chen et al., 2019)  
408 and indicate that uncoating of CCVs in auxilin KO by GAK or alternative ways would result in  
409 SVs with an improper protein stoichiometry.

#### 410 **DISCUSSION:**

411 Recent advancements in PD genetics have led to the identification of mutations in proteins that  
412 play crucial roles in SV endocytosis (Gialluisi et al., 2021; Vidyadhara et al., 2019). Mutations in  
413 clathrin uncoating proteins auxilin (*PARK19*) and synaptojanin-1 (*PARK20*) were identified to be  
414 disease-causing; while, sequence variants in GAK, and endophilin-A1 that aids in the recruitment  
415 of synaptojanin-1 to CCVs, increase risk of developing PD. Mutations in receptor-mediated  
416 endocytosis 8 (RME-8; *PARK21*), which facilitates the formation of endosome-derived SVs  
417 through clathrin uncoating, is also linked to PD (Lopert and Patel, 2014). These genetic findings  
418 strongly point to disruptions in clathrin uncoating as important for the pathogenesis of PD.

419 Auxilin KO mice are the first endocytic mutants to faithfully replicate the cardinal features of PD.  
420 The only other murine model with an auxilin loss-of-function mutation (R927G) displayed  
421 moderate behavior deficits but was not accompanied by DA neurodegeneration (Roosen et al.,  
422 2021). Mice with a R258Q mutation in synaptojanin-1 also displayed motor behavior deficits with  
423 no loss of DA neurons or neuroinflammation (Cao et al., 2017). In *Drosophila* loss-of-function  
424 models for the GAK homolog, *auxilin*, and RME-8 mutations, PD phenotypes are only apparent  
425 with induced  $\alpha$ -synuclein overexpression (Song et al., 2017; Yoshida et al., 2018). Thus, endocytic  
426 mutants, besides auxilin KOs, capture only a few aspects of PD. Here, we took advantage of the  
427 fact that auxilin has a defined function in clathrin uncoating, and auxilin KOs are a robust and  
428 faithful model of PD to elucidate the underlying mechanisms. We show that auxilin deficiency  
429 leads to neurodegeneration through three distinct, but overlapping mechanisms, in nigrostriatal  
430 DA termini: 1) Toxic accumulation of cytoplasmic dopamine due to imbalance in CCV/SV ratio  
431 and defective sorting of SVs, 2) Mis-trafficking of DAT that traps the protein in axonal membrane

432 whirls leading to defective dopamine reuptake, and 3) Synaptic autophagy overload. Collectively,  
433 these mechanisms lead to dopamine dys-homeostasis, a trigger of neurodegeneration in PD  
434 (Figure. 8).

435 **Accumulation of cytoplasmic dopamine:** Dopamine is typically sequestered into SVs via  
436 VMAT2 to avoid autooxidation. Dopamine that accumulates in the cytoplasm is oxidized  
437 predominantly to DOPAL and subsequently catabolized to DOPAC. Thus, the elevated DOPAC  
438 levels observed in the dorsal striatum of presymptomatic auxilin KO mice, is an indirect measure  
439 of cytoplasmic dopamine accumulation (Karoum et al., 1994) and increased conversion to  
440 DOPAL, a mediator of dopamine-related toxicity in PD (Masato et al., 2019). The accumulation  
441 of DOPAC is likely due to two factors- an imbalance in the CCV/SV ratio, and SVs with improper  
442 composition. As an outcome of slowed CME (Yim et al., 2010), auxilin KO neurons need to utilize  
443 alternative endocytic pathways to maintain SV pools, which are known to be less stringent in  
444 protein sorting, leading to SVs of variable protein composition (Wu et al., 2014). Proteomic  
445 analysis of CCVs from auxilin KO brains confirmed this tenet and revealed a decrease in copy  
446 number of integral SV membrane proteins. Thus, auxilin mutations are likely to lead to fewer  
447 functional SVs available for neurotransmitter filling and release. This is supported by our  
448 neurochemical analysis which showed a decrease in extracellular dopamine metabolite 3-MT  
449 which suggest dopamine release defects (Waldmeier et al., 1981). The FSCV based computational  
450 model also predicted dopamine release defects, suggesting defective SV sequestration of dopamine  
451 in auxilin KOs. Though our CCV analysis was not sufficiently sensitive to detect VMAT2, there  
452 is a possibility of its downregulation in auxilin KO CCVs considering the decrease of two other  
453 key vesicular neurotransmitter transporters, VGLUT1 and VGLUT2. Vesicular dopamine uptake  
454 is known to be decreased in patients with PD and other synucleinopathies (Goldstein et al., 2011).  
455 VMAT2 deficient mice develop PD phenotypes, similar to auxilin KO mice, via cytosolic  
456 dopamine accumulation (Caudle et al., 2007). Previous studies have shown that DOPAL-modified  
457  $\alpha$ -synuclein oligomers form pores in SVs causing increased DA leakage into the cytoplasm  
458 (Plotegher et al., 2017). While SV sorting deficits probably occur in all types of synapses leading  
459 to neurotransmitter compartmentalization defects, the properties of dopamine catabolites like  
460 DOPAL are likely to render DA synapses vulnerable (Figure. 8a-c).

461 **Dopamine reuptake dysfunction and DAT mislocalization in membrane deformities:**

462 Extracellular dopamine in the synaptic cleft is cleared by reuptake into the presynaptic sites  
463 through plasma membrane DATs and/or enzymatic degradation to 3-MT by COMT. The relative  
464 contribution of DAT and COMT to clear extracellular dopamine varies by brain region. In dorsal  
465 striatum, reuptake by DAT plays a major role in clearing extracellular dopamine, whereas COMT  
466 has negligible role (Myöhänen et al., 2010; Yavich et al., 2007). Nigrostriatal DA presynapses  
467 depend heavily on DAT-mediated dopamine reuptake to replenish their readily releasable  
468 neurotransmitter pool. A significant delay in clearing evoked dopamine from the dorsal striatum  
469 *in vivo* and *in silico* along with presence of large DAT+ve deformities both in fixed tissue and *ex*  
470 *vivo* clearly indicate DAT dysfunction in auxilin KO mice. This appears to be a defining feature  
471 of DA neurodegenerative phenotypes in auxilin KOs. Dopamine reuptake dysfunction for an  
472 extended period may lead to striatal dopamine loss as seen in DAT KOs (Jones et al., 1998), and  
473 exacerbate PD pathology in auxilin KO mice.

474 Live slice imaging of rhodamine-tagged dichloropane which binds to plasma membrane DAT, as  
475 well as the DAT-immunogold labelling in the dorsal striatum confirmed DAT-rich axonal  
476 membrane deformities in auxilin KOs. Similar DAT positive membrane whirls have been  
477 described for synaptojanin-1 PD mutants (Cao et al., 2017), and may be a common feature of  
478 endocytic PD mutants. Other evidence of axonal damage comes from our proteomic findings as  
479 well, where neurofilament proteins that maintain axonal integrity were altered, including an  
480 increase in NF-L, a marker of neuroaxonal damage. In DA presynapses, DAT localization to the  
481 plasma membrane is dynamically regulated by endocytic trafficking and recycling. It remains to  
482 be determined whether auxilin and synaptojanin-1 participate in endocytic recycling of DAT in  
483 the DA neurons and will be explored in the future. However, our observations suggest that the  
484 dopamine reuptake decrement seen in auxilin KOs occur principally due to DA axonal membrane  
485 deformities which trap DAT (Figure. 8d).

486 **Synaptic autophagy overload:** Owing to the higher turnover of synaptic proteins, vesicles, and  
487 mitochondria in presynaptic sites, autophagosome biogenesis occurs at a higher rate in the distal  
488 axons than in the soma (Maday and Holzbaur, 2014). Due to limited lysosomal activity, synaptic  
489 termini depend on retrograde microtubule-based axonal transport of autophagosomes towards the  
490 lysosome-rich soma for degradation. Tonic activity of DA neurons is likely to keep basal



491 autophagy rates high, and the requirement to transport autophagosomes long distances via  
492 extensive arborization make DA axons vulnerable to additional autophagic burden. Ultrastructural  
493 evaluation of dorsal striatum of auxilin KO mice revealed an increase in synaptic autophagosomes,  
494 which was more pronounced in Type II synapses. We also observed autophagosomes containing  
495 CCVs and SVs in auxilin KO synapses. We find evidence for increased mTOR signaling and  
496 activation of autophagic pathways in the synaptosomal proteomic data at symptomatic age,  
497 supporting elevated synaptic autophagy in auxilin KO mice. Rapamycin-induced enhancement of  
498 autophagy in DA presynapses of mice striatal slices have been shown to sequester SVs and  
499 decrease evoked dopamine release (Hernandez et al., 2012). A similar event in auxilin KO  
500 synapses might exacerbate cytosolic dopamine accumulation (Figure. 8a). Enhanced synaptic  
501 autophagy to clear missorted SVs and CCVs, as well as the products of toxic dopamine-oxidation  
502 could overload DA projections with autophagic vacuoles. Autophagosome accumulation, impaired  
503 retrograde transport as well as abnormal axonal deformities in DA axons have been previously  
504 noted in neurons from patients with PD and Alzheimer's disease (Hill and Colón-Ramos, 2020;  
505 Kouroupi et al., 2017; Nixon et al., 2005). EM revealed some of the autophagic vacuoles near the  
506 whirl-like axonal deformity in auxilin KO striatum. Though we presently do not understand the  
507 relationship between these two structures, DA axonal deformities observed in auxilin KOs may be  
508 a result of autophagic overload in DA termini.

509 In conclusion, our findings indicate that pathology of PD mediated by auxilin deficiency begin  
510 with a disruption of CME, which leads to fewer functional SVs for neurotransmitter filling. While  
511 these deficits occur at all synapses, it appears to have a particularly detrimental effect at  
512 nigrostriatal DA synapses due to the toxicity of cytosolic dopamine, and DAT reuptake alterations.  
513 Thus, investigating auxilin loss-of-function has also advanced our understanding of the  
514 mechanisms for DA vulnerability of PD.

#### 515 **STAR METHODS:**

516 **Mice:** Auxilin KO mice have been previously described (Yim et al., 2010) and were bred to  
517 C57BL6/J mice to make them congenic. Auxilin homozygous KOs were compared to WT  
518 C57BL6/J from Jackson Laboratories, Maine. We have an IACUC approved protocol to maintain  
519 these mice.

520 **Motor behavior evaluation:** WT and auxilin KO cohorts were examined longitudinally at 3, 6,  
521 9, 12, and 15 months of age (n=12-16 mice/genotype, sex-balanced) in motor behavioral assays.  
522 For evaluation of overall locomotory capabilities, mice were allowed to explore an open field  
523 arena, which was videotaped to assess the distance travelled in 5 mins using Noldus Ethovision  
524 CT software. The number of fecal pellets excreted during open field behavior test was evaluated  
525 as a measure of anxiety. The balance beam test was used to assess motor coordination by  
526 evaluating the ability to walk straight on a narrow beam from a brightly lit end towards a dark and  
527 safe box. Latency to traverse the beam and the number of times a mouse could perform this  
528 behavior in a minute were evaluated. The grip strength of the forelimbs and all the limbs was  
529 assessed by measuring the maximum force (g) exerted by the mouse in grasping specially designed  
530 pull bar assemblies attached to a grip strength meter (Columbus Instruments, Ohio, USA) in  
531 tension mode. A four-lane Rotarod was used to assess motor coordination and balance (Columbus  
532 Instruments, Ohio, USA). Mice were made to run for 300 secs on the rotating spindle of the  
533 Rotarod, which was accelerating from 4 to 40 rpm. Each mouse was subjected to three trials with  
534 a 30 min inter-trial recovery period. The average of the latency to fall and the rpm in these trials  
535 was used as a measure of motor performance. The procedure was repeated for four consecutive  
536 days in both WT and auxilin KO mice. We did not see a significant sex-based differences in all  
537 the behavior assays in auxilin KO mice and data from both sexes was collated.

538 **Immunohistochemistry:** WT and auxilin KO mice at 3 and 9 months of age (n=5-6/group; sex-  
539 balanced) were anaesthetized using isoflurane inhalation and perfused intracardially with 0.9 %  
540 heparinized saline followed by chilled 4 % paraformaldehyde (PFA) in 0.1 M phosphate buffer  
541 (PB). The brains were post-fixed in the same buffer for 48 hours and cryoprotected in increasing  
542 grades of buffered sucrose (15 and 30 %, prepared in 0.1 M PB), at 4 °C, and stored at -80 °C  
543 until sectioning. Serial sections of the brains (30 µm thick) were performed coronally using a  
544 cryostat (Leica CM1850, Germany), collected on gelatinized slides, and stored at -20 °C. Every  
545 sixth nigral section was subjected to immunoperoxidase staining and every 10<sup>th</sup> striatal section was  
546 used for immunofluorescence staining as per our earlier protocol (Vidyadhara et al., 2017). Briefly,  
547 for immunoperoxidase staining, endogenous peroxidase quenching was performed using 0.1 %  
548 H<sub>2</sub>O<sub>2</sub> in 70 % methanol (30 mins), followed by blocking using 3 % bovine serum albumin (BSA)  
549 (2 hours) at room temperature (RT). Sections were then incubated at 4 °C with TH primary  
550 antibody (1:500, overnight) followed by biotin-conjugated secondary antibody at RT (1:200; 3-4

551 hours, Vector Laboratories, PK-6101). Tertiary labeling was performed with the avidin-biotin  
552 complex solution at RT (1:100; 3-4 hours, Vector Laboratories, PK-6101). Staining was visualized  
553 using 3,3'-diaminobenzidine (Fluka, 32750) as a chromogen in a solution of 0.1 M acetate  
554 imidazole buffer (pH 7.4) and H<sub>2</sub>O<sub>2</sub> (0.1 %). For immunofluorescence staining, sections were  
555 incubated in 0.5 % Triton-X-100 (15 mins), followed by incubation in 0.3 M glycine (20 mins).  
556 Blocking was performed using 3% goat serum, followed by overnight incubation (4° C) in primary  
557 antibodies. Sections were then incubated in Alexa-conjugated secondaries (Thermo Fisher  
558 Scientific, USA) for 3-4 hours, followed by coverslip mounting using an antifade mounting  
559 medium with (H-1000, Vectashield) or without DAPI (H-1200, Vectashield). Coverslips were  
560 sealed using nail polish. 1X PBS with 0.1 % Triton-X-100 was used as both washing and dilution  
561 buffer for both immunoperoxidase and immunofluorescence staining, except for pSer129- $\alpha$ -Syn  
562 where 1X Tris buffer saline was used. Below is the list of antibodies used and their dilutions.  
563

| <b>Antibody</b>                                    | <b>Dilution</b> | <b>Manufacturer</b>        | <b>RRID</b>       |
|----------------------------------------------------|-----------------|----------------------------|-------------------|
| Rabbit Anti-TH                                     | 1:500           | Millipore (AB152)          | RRID: AB_390204   |
| Mouse Anti-TH                                      | 1:500           | Synaptic Systems (213211)  | RRID: AB_2636901  |
| Rabbit Anti-Iba1                                   | 1:300           | Wako Chemicals (019-19741) | RRID: AB_839504   |
| Guinea Pig Anti-GFAP                               | 1:400           | Synaptic Systems (173004)  | RRID: AB_10641162 |
| Guinea Pig Anti-DAT                                | 1:300           | Synaptic Systems (284005)  | RRID: AB_2620019  |
| Rabbit Anti- $\alpha$ -synuclein<br>(phospho S129) | 1:800           | Abcam (ab51253)            | RRID: AB_869973   |
| Mouse Anti-Clathrin light<br>chain                 | 1:200           | Synaptic Systems (113011)  | RRID: AB_887706   |
| Rabbit Anti-Synaptogyrin 3                         | 1:200           | Synaptic Systems (103303)  | RRID: AB_2619753  |
| Rabbit Anti-VGAT                                   | 1:500           | Synaptic Systems (131002)  | RRID: AB_887871   |
| Guinea Pig Anti-VGLUT2                             | 1:500           | Synaptic Systems (135418)  | RRID: AB_2864786  |
| Rat Anti-Hsc70                                     | 1:100           | Enzo (ADI-SPA-815-D)       | RRID: AB_2039279  |
| Rabbit Anti-Endophilin-A1                          | 1:200           | Synaptic Systems (159002)  | RRID: AB_887757   |

564 **Unbiased stereology:** The SNpc was delineated on every 6<sup>th</sup> TH+ve midbrain section(Fu et al.,  
565 2012) using a 10X objective of a brightfield microscope equipped with StereoInvestigator

566 (Software Version 8.1, Micro-brightfield Inc., Colchester, USA). The stereological quantification  
567 of TH+ve DA neurons was performed using the optical fractionator probe of the  
568 StereoInvestigator(Vidyadhara et al., 2017). The neurons were counted using 40X objective, with  
569 a regular grid interval of 22,500  $\mu\text{m}^2$  (x=150  $\mu\text{m}$ , y=150  $\mu\text{m}$ ) and a counting frame size of 3600  
570  $\mu\text{m}^2$  (x=60  $\mu\text{m}$ , y=60  $\mu\text{m}$ ). The mounted thickness was identified to be around 22.5  $\mu\text{m}$ , which was  
571 also determined at every fifth counting site. A guard zone of 3.5  $\mu\text{m}$  was implied on either side,  
572 thus providing 15  $\mu\text{m}$  of z-dimension to the optical dissector. The quantification began at the first  
573 anterior appearance of TH+ve neurons in SNpc to the caudal most part in each hemisphere(Fu et  
574 al., 2012) separately, which was later summed to derive total numbers.

575 **Confocal microscopy and image analysis:** Fluorescent images were acquired using a laser  
576 scanning confocal microscope (LSM 800, Zeiss) with a 20X or 40X objective for quantitation and  
577 63X for representation using an appropriate Z-depth. All the images were blinded for genotype  
578 and age before subjecting to analysis using FIJI software from National Institute of Health (NIH).  
579 After performing sum intensity projection, the expression intensity was measured on an 8-bit  
580 image as the mean gray value on a scale of 0–255, where ‘0’ refers to minimum fluorescence and  
581 ‘255’ refers to maximum fluorescence. For counting Iba1+ve microglial cells, images were  
582 thresholded using the ‘otsu’ algorithm and the cells larger than 75-pixel units for a given image  
583 were counted using the ‘analyze particles’ function. GFAP+ve astroglial cells were counted  
584 manually using the ‘cell counter’ function. For counting DAT+ve structures, images were  
585 thresholded using ‘triangle’ algorithm, followed by ‘analyse particles’ function. All the structures  
586 of size 5  $\mu\text{m}$  and above and the circulating between 0.3 to 1 were counted. SNpc, VTA and SNpr  
587 were demarcated as per Fu et al., 2012, colabeling with TH-immunostaining (Fu et al., 2012).  
588 Dorsal and ventral striata were demarcated as per Paxinos and Franklin, 2008 (Keith Franklin,  
589 2008).

590 **Proteomic analysis:** Whole brain, synaptosomes and CCV samples were prepared from 3-month-  
591 old WT and auxilin KO mice. Brains from 3-month-old WT and auxilin KO mice (n=3/genotype)  
592 were homogenized in homogenization buffer (detergent-free 320 mM sucrose in 10 mM HEPES,  
593 pH 7.4 with protease and phosphatase inhibitors cocktail). Part of the homogenate was snap-frozen  
594 for whole brain proteomics. Rest of the homogenate was used to prepare synaptosomes as  
595 described previously (De Camilli et al., 1983). Synaptosomes integrity was confirmed by EM

596 before performing LFQ-MS. For CCVs sample preparation, brains from 14 pairs of WT and  
597 auxilin KO mice were pooled to obtain a single CCV fraction (Blondeau et al., 2004) as we have  
598 published previously (Vargas et al., 2014). Three independent purifications were performed and  
599 the resulting CCVs fractions were subjected to LFQ-MS. The purity of CCVs was confirmed by  
600 EM (Figure. 7a).

601 LFQ-MS was performed at Yale Mass Spectrometry & Proteomics Resource of the W.M. Keck  
602 Foundation Biotechnology Resource Laboratory. Samples were analyzed in technical triplicates.  
603 The raw mass spectrometry data will be publicly available upon publication in the PRIDE  
604 depository. The data was normalized to internal controls and total spectral counts. Proteins with  
605 two or more unique peptide counts were listed using UniProt nomenclature and included for further  
606 analysis. A 1.5-fold change and a p-value difference of  $<0.05$  between WT and auxilin KO are  
607 considered as significant. Heat maps for significantly changed proteins were produced using  
608 Qlucore Omics Explorer. IPA (Qiagen) was used to determine the most significantly affected  
609 canonical pathways and their overlap.

610 **High-performance liquid chromatography (HPLC):** Sex balanced, auxilin KO mice at 3, 6, 9,  
611 12, and 15 months of age with appropriate controls (n=8-12/genotype) were anesthetized using  
612 isoflurane inhalation. Mice were then sacrificed by cervical dislocation, and the brains were  
613 quickly removed and dissected for dorsal striatum. These samples were subjected to HPLC at  
614 Vanderbilt Neurochemistry Core Laboratory, Vanderbilt University. We did not notice a  
615 significant sex-based difference in HPLC results in auxilin KO mice.

616 **Surgery and *in vivo* Fast Scanning Cyclic Voltammetry (FSCV):** Surgeries and electrochemical  
617 recordings were conducted like our published procedure (Somayaji et al., 2020). Briefly, mice were  
618 anesthetized with isoflurane (SomnoSuite Small Animal Anesthesia System, Kent Scientific;  
619 induction 2.5%, maintenance 0.8–1.4% in O<sub>2</sub>, 0.35 l/min) and head-fixed on a stereotaxic frame  
620 (Kopf Instruments, Tujunga, CA). Puralube vet ointment was applied on the eye to prevent cornea  
621 from drying out. Stereotactic drill (0.8 mm) was used to preform craniotomy (unilateral, right) to  
622 target the midbrain and dorsal striatum with the following coordinates (Keith Franklin, 2008)  
623 (values are in mm from Bregma); midbrain: anteroposterior = -2.9, mediolateral=+1.0,  
624 dorsoventral=+4; Dorsal Striatum: anteroposterior = +1.2, mediolateral = +1.3, dorsoventral =  
625 +3.1. An Ag/AgCl reference electrode via a saline bridge was placed under the skin. For electrical

626 stimulations, a 22G bipolar stimulating electrode (P1 Technologies, VA, USA) was lowered to  
627 target ventral midbrain (between 4-4.5mm). The exact depth was adjusted for maximal dopamine  
628 release. For recording the evoked dopamine release, a custom-built carbon fiber electrode (5  $\mu\text{m}$   
629 diameter, cut to  $\sim 150 \mu\text{m}$  length, Hexcel Corporation, CT, USA) was lowered to reach dorsal  
630 striatum. Dil-coated carbon-fiber electrodes were used to identify the electrode position in the  
631 dorsal striatum and the electrode track in the brain tissue identified the position of the stimulation  
632 electrode (Supplementary Figure. 3c). The evoked dopamine release was measured using constant  
633 current (400 $\mu\text{A}$ ), delivered using an Iso-Flex stimulus isolator triggered by a Master-9 pulse  
634 generator (AMPI, Jerusalem, Israel). A single burst stimulation consisted of 30 pulses at 50Hz  
635 (0.6s). Electrodes were calibrated using known concentration of dopamine in ACSF. Custom-  
636 written procedure in IGOR Pro was used for the data acquisition and analysis.

637 **Computational model of dopamine reuptake and release:** The model is comprised of a system  
638 of ordinary differential equations (ODEs), where equations (1) and (3) form a two-compartment  
639 model to simulate the release of dopamine (DA) from synaptic vesicles into the dorsal striatum  
640 and the diffusion of DA towards the carbon-fiber electrode through a “dead space” (i.e. an area of  
641 damaged tissue around the carbon fiber electrode) (Benoit-Marand et al., 2007):

$$\frac{d[DA]_S}{dt} = [DA]_P I f S + L[DA]_E - \frac{V_m [DA]_S}{[DA]_S + K_m} \quad (1)$$

$$S = \sum_i \theta(t - t_i) \theta\left(t_i + \frac{NP}{f} - t\right) \quad (2)$$

$$\frac{d[DA]_E}{dt} = L([DA]_S - [DA]_E) + \Gamma_{DA} \quad (3)$$

$$\frac{d\Gamma_{DA}}{dt} = k_{ads}[DA]_E - k_{des}\Gamma_{DA} \quad (4)$$

642 The first compartment  $[DA]_S$  sums the concentration of DA released into the striatum, the  
643 concentration of DA that returns to the carbon-fiber electrode due to its reflective surface (Schmitz  
644 et al., 2001), and the concentration of DA removed through reuptake by DAT.  $[DA]_P$  is the  
645 concentration of DA release per electrical stimulus pulse, while  $I$  and  $f$  are the stimulus current  
646 and stimulus frequency of the experimental protocol. The electrical pulse trains are modeled using  
647 the stimulation pattern  $S$ , where  $\theta$  is the Heaviside theta function,  $t_i$  is the start time of the stimulus,  
648 and  $NP$  is the number of electrical pulses. DAT uptake is modeled using first-order Michaelis-

649   Menten kinetics (Michaelis et al., 2011; Wightman and Zimmerman, 1990), with  $V_m$  and  $K_m$  as  
650   the maximal velocity and affinity constant of DA. The second compartment  $[DA]_E$  computes the  
651   difference between the DA that arrives from the striatum and the DA that bounces off the electrode,  
652   with a loss factor  $L < 1$  used to account for the diffusion through the dead space. Equation (4) is  
653   used to model the electrochemical adsorption that occurs with carbon-fiber electrodes (Bath et al.,  
654   2000) and is included in the calculation of  $[DA]_E$ , and  $k_{ads}$  and  $k_{des}$  are the adsorption and  
655   desorption kinetic rate constants.

656   ***Ex vivo* dichloropane-DAT imaging and quantitation:** Dichloropane, a DAT ligand, was  
657   conjugated with rhodamine red-X as described by Fiala et al., 2020 (Fiala et al., 2020) to obtain  
658   dichloropane–rhodamine red-X probe (dichloropane probe). Mice (n=5/genotype) were sacrificed  
659   by cervical dislocation under isoflurane anesthesia and the brains were quickly dissected. Coronal  
660   slices (300  $\mu$ m) of striatum were cut (VT1200S, Leica) in ice-cold carbogenated solution  
661   containing: 100 mM choline chloride, 25 mM NaHCO<sub>3</sub>, 1.25 mM NaH<sub>2</sub>PO<sub>4</sub>, 2.5 mM KCl, 7 mM  
662   MgCl<sub>2</sub>, 0.5 mM CaCl<sub>2</sub>, 15 mM glucose, 11.6 mM sodium ascorbate, and 3.1 mM sodium pyruvate.  
663   Striatal slices were incubated at 37 °C (30 mins) in carbogenated ACSF containing: 127 mM NaCl,  
664   25 mM NaHCO<sub>3</sub>, 1.25 mM NaH<sub>2</sub>PO<sub>4</sub>, 2.5 mM KCl, 1 mM MgCl<sub>2</sub>, 2 mM CaCl<sub>2</sub> and 15 mM  
665   glucose. Slices were then warmed to room temperature in carbogenated ACSF and incubated in  
666   dichloropane probe (100 nM) for 45 mins at 37°C. Following this, slices were washed once in  
667   carbogenated ACSF and the dorsal striata maintained in ACSF were imaged under 25X water  
668   immersion objective at 561 nm excitation using a confocal microscope (LSM 900, Zeiss). Images  
669   were analyzed blind to the genotype for the presence of large DAT+ve structures and the number  
670   of DAT+ve puncta using FIJI software.

671   **Electron microscopy:** 3-month-old mice brains (n=2-3/genotype) were fixed by intracardial  
672   perfusion using 2% PFA and 2% glutaraldehyde prepared in 0.1M PB, followed by overnight  
673   immersion in 0.1 M cacodylate buffer with 2.5 % of glutaraldehyde and 2 % PFA. For DAT-  
674   immunogold labeling (15 nm gold particles), we used 3% PFA prepared in 1X PBS for intracardial  
675   perfusion, and 2% PFA and 0.15% glutaraldehyde prepared in 1X PBS for immersion fixation.  
676   Dorsal striatum was dissected, further processed at the Yale Center for Cellular and Molecular  
677   Imaging, Electron Microscopy Facility. EM imaging was performed using FEI Tecnai G2 Spirit  
678   BioTwin Electron Microscope. Images were analyzed blinded to the genotype using FIJI software

679 for synaptic autophagosomes, both in symmetric and asymmetric synapses. Similarly, synaptic  
680 CCVs and SVs per synapse were also counted, along with examining the images for axonal whirls  
681 and early autophagic vacuoles.

682 For EM of purified CCVs and clathrin cages, buffer containing CCVs was pipetted onto a parafilm  
683 containing glutaraldehyde and uranyl acetate to make a 18% glutaraldehyde and 73% uranyl  
684 acetate solution in 1X PBS. EM grids were floated on top of pipetted droplets and then dried for  
685 imaging, using Philips 301 Electron Microscope. Diameter of the CCVs and empty clathrin cages,  
686 as well as their numbers were measured using iTEM software (ResAlta Research Technologies,  
687 USA).

688 **Statistics:** For behavioral studies, two-way repeated measure ANOVA followed by Sidak's  
689 multiple comparison test was used. For all other experiments, Student's t-test with Welch's  
690 correction was used. Values are expressed as mean  $\pm$  standard error of the mean (SEM) and *p* value  
691 of 0.05 or less was considered statistically significant. Student's t-test was also used to check if  
692 there are sex-based differences in the experimental results within auxilin KO mice, which was not  
693 significant.

694 **ACKNOWLEDGMENTS:** This work was supported by Parkinson's Foundation Research  
695 Center of Excellence (PF-RCE-1946), Nina Compagnon Hirshfeld Parkinson's Disease Research  
696 Fund to SSC, and Michael J. Fox Foundation Target Advancement Program grant (MJFF-020160)  
697 to SSC and VDJ. SSC and DS are funded by ASAP and are members of the ASAP CRN. We thank  
698 Pietro De Camilli for his input and valuable suggestions. We acknowledge John Lee's help in  
699 initial behavioral experiments. We thank Sofia M. Tieze and Phil Coish for reading the manuscript.  
700 We thank the Strittmatter lab for providing access to the open field behavior setup, and the Rakic  
701 Lab for the StereoInvestigator facility.

702 **AUTHOR CONTRIBUTIONS:** VDJ, DLS and SSC conceptualized the study. VDJ performed  
703 all behavior and histochemical experiments, imaging, quantitation and proteomic analyses. MS  
704 performed *in vivo* FSCV experiments. NW performed analyses of CCV proteomics and EM  
705 images. BY performed mice genotyping. HZ prepared CCVs. SN performed computational  
706 analysis. JR helped in immunofluorescence image analysis and illustrations. JG prepared *ex vivo*  
707 brain slices. TLL performed LFQ-MS. DS and LG provided reagents and founder mice colonies.  
708 VDJ and SSC wrote the manuscript. All authors have read and provided inputs to the manuscript.



709 **CONFLICT OF INTERESTS:** The authors declare no conflict of interests.

710 **REFERENCES:**

- 711 Ahlers-Dannen, K.E., Spicer, M.M., and Fisher, R.A. (2020). RGS Proteins as Critical Regulators of Motor  
712 Function and Their Implications in Parkinson's Disease. *Mol Pharmacol* 98, 730-738.
- 713 Bäckström, D., Linder, J., Jakobson Mo, S., Riklund, K., Zetterberg, H., Blennow, K., Forsgren, L., and  
714 Lenfeldt, N. (2020). NfL as a biomarker for neurodegeneration and survival in Parkinson disease.  
715 *Neurology* 95, e827-e838.
- 716 Bath, B.D., Michael, D.J., Trafton, B.J., Joseph, J.D., Runnels, P.L., and Wightman, R.M. (2000).  
717 Subsecond adsorption and desorption of dopamine at carbon-fiber microelectrodes. *Anal Chem* 72, 5994-  
718 6002.
- 719 Benoit-Marand, M., Suaud-Chagny, M.F., and Gonon, F. (2007). Presynaptic Regulation of Extracellular  
720 Dopamine as Studied by Continuous Amperometry in Anesthetized Animals
- 721 *Electrochemical Methods for Neuroscience* (Boca Raton FL: © Taylor & Francis Group, LLC.).
- 722 Binotti, B., Pavlos, N.J., Riedel, D., Wenzel, D., Vorbrüggen, G., Schalk, A.M., Kühnel, K., Boyken, J.,  
723 Erck, C., Martens, H., *et al.* (2015). The GTPase Rab26 links synaptic vesicles to the autophagy pathway.  
724 *Elife* 4, e05597.
- 725 Block, E.R., Nuttle, J., Balcita-Pedicino, J.J., Caltagarone, J., Watkins, S.C., Sesack, S.R., and Sorkin, A.  
726 (2015). Brain Region-Specific Trafficking of the Dopamine Transporter. *J Neurosci* 35, 12845-12858.
- 727 Blondeau, F., Ritter, B., Allaire, P.D., Wasiak, S., Girard, M., Hussain, N.K., Angers, A., Legendre-  
728 Guillemin, V., Roy, L., Boismenu, D., *et al.* (2004). Tandem MS analysis of brain clathrin-coated vesicles  
729 reveals their critical involvement in synaptic vesicle recycling. *Proc Natl Acad Sci U S A* 101, 3833-3838.
- 730 Bocker, C., Cantore, M., Failli, P., and Vasiliou, V. (2011). Aldehyde dehydrogenase 7A1 (ALDH7A1)  
731 attenuates reactive aldehyde and oxidative stress induced cytotoxicity. *Chem Biol Interact* 191, 269-277.
- 732 Bu, M., Farrer, M.J., and Khoshbouei, H. (2021). Dynamic control of the dopamine transporter in  
733 neurotransmission and homeostasis. *NPJ Parkinsons Dis* 7, 22.
- 734 Cao, M., Wu, Y., Ashrafi, G., McCartney, A.J., Wheeler, H., Bushong, E.A., Boassa, D., Ellisman, M.H.,  
735 Ryan, T.A., and De Camilli, P. (2017). Parkinson Sac Domain Mutation in Synaptojanin 1 Impairs Clathrin  
736 Uncoating at Synapses and Triggers Dystrophic Changes in Dopaminergic Axons. *Neuron* 93, 882-896  
737 e885.
- 738 Caudle, W.M., Richardson, J.R., Wang, M.Z., Taylor, T.N., Guillot, T.S., McCormack, A.L., Colebrooke,  
739 R.E., Di Monte, D.A., Emson, P.C., and Miller, G.W. (2007). Reduced vesicular storage of dopamine  
740 causes progressive nigrostriatal neurodegeneration. *J Neurosci* 27, 8138-8148.
- 741 Chanaday, N.L., Cousin, M.A., Milosevic, I., Watanabe, S., and Morgan, J.R. (2019). The Synaptic Vesicle  
742 Cycle Revisited: New Insights into the Modes and Mechanisms. *J Neurosci* 39, 8209-8216.
- 743 Chen, L., Xie, Z., Turkson, S., and Zhuang, X. (2015). A53T human  $\alpha$ -synuclein overexpression in  
744 transgenic mice induces pervasive mitochondria macroautophagy defects preceding dopamine neuron  
745 degeneration. *J Neurosci* 35, 890-905.
- 746 Chen, Y., Yong, J., Martínez-Sánchez, A., Yang, Y., Wu, Y., De Camilli, P., Fernández-Busnadiego, R.,  
747 and Wu, M. (2019). Dynamic instability of clathrin assembly provides proofreading control for endocytosis.  
748 *J Cell Biol* 218, 3200-3211.
- 749 Clayton, P.T. (2020). The effectiveness of correcting abnormal metabolic profiles. *J Inherit Metab Dis* 43,  
750 2-13.
- 751 De Camilli, P., Harris, S.M., Jr., Huttner, W.B., and Greengard, P. (1983). Synapsin I (Protein I), a nerve  
752 terminal-specific phosphoprotein. II. Its specific association with synaptic vesicles demonstrated by  
753 immunocytochemistry in agarose-embedded synaptosomes. *J Cell Biol* 96, 1355-1373.
- 754 Edvardson, S., Cinnamon, Y., Ta-Shma, A., Shaag, A., Yim, Y.I., Zenvirt, S., Jalas, C., Lesage, S., Brice,  
755 A., Taraboulos, A., *et al.* (2012). A deleterious mutation in DNAJC6 encoding the neuronal-specific  
756 clathrin-uncoating co-chaperone auxilin, is associated with juvenile parkinsonism. *PLoS One* 7, e36458.

757 Elsayed, L.E., Drouet, V., Usenko, T., Mohammed, I.N., Hamed, A.A., Elseed, M.A., Salih, M.A., Koko,  
758 M.E., Mohamed, A.Y., Siddig, R.A., *et al.* (2016). A Novel Nonsense Mutation in DNAJC6 Expands the  
759 Phenotype of Autosomal-Recessive Juvenile-Onset Parkinson's Disease. *Ann Neurol* 79, 335-337.  
760 Fiala, T., Wang, J., Dunn, M., Šebej, P., Choi, S.J., Nwadibia, E.C., Fialova, E., Martinez, D.M., Cheetham,  
761 C.E., Fogle, K.J., *et al.* (2020). Chemical Targeting of Voltage Sensitive Dyes to Specific Cells and  
762 Molecules in the Brain. *J Am Chem Soc* 142, 9285-9301.  
763 Fotin, A., Cheng, Y., Grigorieff, N., Walz, T., Harrison, S.C., and Kirchhausen, T. (2004). Structure of an  
764 auxilin-bound clathrin coat and its implications for the mechanism of uncoating. *Nature* 432, 649-653.  
765 Fu, Y., Yuan, Y., Halliday, G., Rusznák, Z., Watson, C., and Paxinos, G. (2012). A cytoarchitectonic and  
766 chemoarchitectonic analysis of the dopamine cell groups in the substantia nigra, ventral tegmental area, and  
767 retrorubral field in the mouse. *Brain Struct Funct* 217, 591-612.  
768 Gialluisi, A., Reccia, M.G., Modugno, N., Natile, T., Lombardi, A., Di Giovannantonio, L.G., Pietracupa,  
769 S., Ruggiero, D., Scala, S., Gambardella, S., *et al.* (2021). Identification of sixteen novel candidate genes  
770 for late onset Parkinson's disease. *Mol Neurodegener* 16, 35.  
771 Goldstein, D.S., Holmes, C., Kopin, I.J., and Sharabi, Y. (2011). Intra-neuronal vesicular uptake of  
772 catecholamines is decreased in patients with Lewy body diseases. *J Clin Invest* 121, 3320-3330.  
773 Harris, K.M., and Weinberg, R.J. (2012). Ultrastructure of synapses in the mammalian brain. *Cold Spring*  
774 *Harb Perspect Biol* 4.  
775 Hernandez, D., Torres, C.A., Setlik, W., Cebrian, C., Mosharov, E.V., Tang, G., Cheng, H.C., Kholodilov,  
776 N., Yarygina, O., Burke, R.E., *et al.* (2012). Regulation of presynaptic neurotransmission by  
777 macroautophagy. *Neuron* 74, 277-284.  
778 Hill, S.E., and Colón-Ramos, D.A. (2020). The Journey of the Synaptic Autophagosome: A Cell Biological  
779 Perspective. *Neuron* 105, 961-973.  
780 Jones, S.R., Gainetdinov, R.R., Jaber, M., Giros, B., Wightman, R.M., and Caron, M.G. (1998). Profound  
781 neuronal plasticity in response to inactivation of the dopamine transporter. *Proc Natl Acad Sci U S A* 95,  
782 4029-4034.  
783 Karoum, F., Chrapusta, S.J., and Egan, M.F. (1994). 3-Methoxytyramine is the major metabolite of released  
784 dopamine in the rat frontal cortex: reassessment of the effects of antipsychotics on the dynamics of  
785 dopamine release and metabolism in the frontal cortex, nucleus accumbens, and striatum by a simple two  
786 pool model. *J Neurochem* 63, 972-979.  
787 Keith Franklin, G.P. (2008). *The Mouse Brain in Stereotaxic Coordinates*, Compact, 3rd edn (Elsevier).  
788 Kordower, J.H., Olanow, C.W., Dodiya, H.B., Chu, Y., Beach, T.G., Adler, C.H., Halliday, G.M., and  
789 Bartus, R.T. (2013). Disease duration and the integrity of the nigrostriatal system in Parkinson's disease.  
790 *Brain* 136, 2419-2431.  
791 Köroğlu, Ç., Baysal, L., Cetinkaya, M., Karasoy, H., and Tolun, A. (2013). DNAJC6 is responsible for  
792 juvenile parkinsonism with phenotypic variability. *Parkinsonism Relat Disord* 19, 320-324.  
793 Kosillo, P., Doig, N.M., Ahmed, K.M., Agopyan-Miu, A., Wong, C.D., Conyers, L., Threlfell, S., Magill,  
794 P.J., and Bateup, H.S. (2019). Tsc1-mTORC1 signaling controls striatal dopamine release and cognitive  
795 flexibility. *Nat Commun* 10, 5426.  
796 Kouroupi, G., Taoufik, E., Vlachos, I.S., Tsioras, K., Antoniou, N., Papastefanaki, F., Chroni-Tzartou, D.,  
797 Wrasidlo, W., Bohl, D., Stellas, D., *et al.* (2017). Defective synaptic connectivity and axonal  
798 neuropathology in a human iPSC-based model of familial Parkinson's disease. *Proc Natl Acad Sci U S A*  
799 114, E3679-E3688.  
800 Lopert, P., and Patel, M. (2014). Nicotinamide nucleotide transhydrogenase (Nnt) links the substrate  
801 requirement in brain mitochondria for hydrogen peroxide removal to the thioredoxin/peroxiredoxin  
802 (Trx/Prx) system. *J Biol Chem* 289, 15611-15620.  
803 Maday, S., and Holzbaur, E.L. (2014). Autophagosome biogenesis in primary neurons follows an ordered  
804 and spatially regulated pathway. *Dev Cell* 30, 71-85.  
805 Masato, A., Plotegher, N., Boassa, D., and Bubacco, L. (2019). Impaired dopamine metabolism in  
806 Parkinson's disease pathogenesis. *Molecular Neurodegeneration* 14, 35.

807 Michaelis, L., Menten, M.L., Johnson, K.A., and Goody, R.S. (2011). The original Michaelis constant:  
808 translation of the 1913 Michaelis-Menten paper. *Biochemistry* 50, 8264-8269.

809 Mittal, S.O. (2020). Levodopa responsive-generalized dystonic spells and moaning in DNAJC6 related  
810 Juvenile Parkinson's disease. *Parkinsonism Relat Disord* 81, 188-189.

811 Myöhänen, T.T., Schendzielorz, N., and Männistö, P.T. (2010). Distribution of catechol-O-  
812 methyltransferase (COMT) proteins and enzymatic activities in wild-type and soluble COMT deficient  
813 mice. *J Neurochem* 113, 1632-1643.

814 Nalls, M.A., Pankratz, N., Lill, C.M., Do, C.B., Hernandez, D.G., Saad, M., DeStefano, A.L., Kara, E.,  
815 Bras, J., Sharma, M., *et al.* (2014). Large-scale meta-analysis of genome-wide association data identifies  
816 six new risk loci for Parkinson's disease. *Nat Genet* 46, 989-993.

817 Ng, J., Cortès-Saladelafont, E., Abela, L., Termsarasab, P., Mankad, K., Sudhakar, S., Gorman, K.M.,  
818 Heales, S.J.R., Pope, S., Biassoni, L., *et al.* (2020). DNAJC6 Mutations Disrupt Dopamine Homeostasis in  
819 Juvenile Parkinsonism-Dystonia. *Mov Disord* 35, 1357-1368.

820 Nguyen, M., and Krainc, D. (2018). LRRK2 phosphorylation of auxilin mediates synaptic defects in  
821 dopaminergic neurons from patients with Parkinson's disease. *Proc Natl Acad Sci U S A* 115, 5576-5581.

822 Nixon, R.A., Wegiel, J., Kumar, A., Yu, W.H., Peterhoff, C., Cataldo, A., and Cuervo, A.M. (2005).  
823 Extensive involvement of autophagy in Alzheimer disease: an immuno-electron microscopy study. *J*  
824 *Neuropathol Exp Neurol* 64, 113-122.

825 Olgiati, S., Quadri, M., Fang, M., Rood, J.P., Saute, J.A., Chien, H.F., Bouwkamp, C.G., Graafland, J.,  
826 Minneboo, M., Breedveld, G.J., *et al.* (2016). DNAJC6 Mutations Associated With Early-Onset Parkinson's  
827 Disease. *Ann Neurol* 79, 244-256.

828 Plotegher, N., Berti, G., Ferrari, E., Tessari, I., Zanetti, M., Lunelli, L., Greggio, E., Bisaglia, M., Veronesi,  
829 M., Girotto, S., *et al.* (2017). DOPAL derived alpha-synuclein oligomers impair synaptic vesicles  
830 physiological function. *Sci Rep* 7, 40699.

831 Poewe, W., Seppi, K., Tanner, C.M., Halliday, G.M., Brundin, P., Volkman, J., Schrag, A.E., and Lang,  
832 A.E. (2017). Parkinson disease. *Nat Rev Dis Primers* 3, 17013.

833 Querfurth, H., and Lee, H.K. (2021). Mammalian/mechanistic target of rapamycin (mTOR) complexes in  
834 neurodegeneration. *Mol Neurodegener* 16, 44.

835 Ray, S., Padmanabha, H., Mahale, R., Mailankody, P., and Arunachal, G. (2021). DNAJC6 mutation  
836 causing cranial-onset dystonia with tremor dominant levodopa non-responsive parkinsonism: A novel  
837 phenotype. *Parkinsonism Relat Disord* 89, 1-3.

838 Roosen, D.A., Landeck, N., Bonet-Ponce, L., Kluss, J., Conti, M., Smith, N., Saez-Atienzar, S., Ding, J.,  
839 Beilina, A., Kumaran, R., *et al.* (2021). Mutations in Auxilin cause parkinsonism via impaired clathrin-  
840 mediated trafficking at the Golgi apparatus and synapse. *bioRxiv*, 830802.

841 Schmitz, Y., Lee, C.J., Schmauss, C., Gonon, F., and Sulzer, D. (2001). Amphetamine distorts stimulation-  
842 dependent dopamine overflow: effects on D2 autoreceptors, transporters, and synaptic vesicle stores. *J*  
843 *Neurosci* 21, 5916-5924.

844 Somayaji, M., Cataldi, S., Choi, S.J., Edwards, R.H., Mosharov, E.V., and Sulzer, D. (2020). A dual role  
845 for  $\alpha$ -synuclein in facilitation and depression of dopamine release from substantia nigra neurons in vivo.  
846 *Proc Natl Acad Sci U S A* 117, 32701-32710.

847 Song, L., He, Y., Ou, J., Zhao, Y., Li, R., Cheng, J., Lin, C.H., and Ho, M.S. (2017). Auxilin Underlies  
848 Progressive Locomotor Deficits and Dopaminergic Neuron Loss in a Drosophila Model of Parkinson's  
849 Disease. *Cell Rep* 18, 1132-1143.

850 Takamori, S., Holt, M., Stenius, K., Lemke, E.A., Grønborg, M., Riedel, D., Urlaub, H., Schenck, S.,  
851 Brügger, B., Ringler, P., *et al.* (2006). Molecular anatomy of a trafficking organelle. *Cell* 127, 831-846.

852 Taoufiq, Z., Ninov, M., Villar-Briones, A., Wang, H.Y., Sasaki, T., Roy, M.C., Beauchain, F., Mori, Y.,  
853 Yoshida, T., Takamori, S., *et al.* (2020). Hidden proteome of synaptic vesicles in the mammalian brain.  
854 *Proc Natl Acad Sci U S A* 117, 33586-33596.

855 Ungewickell, E., Ungewickell, H., Holstein, S.E., Lindner, R., Prasad, K., Barouch, W., Martin, B., Greene,  
856 L.E., and Eisenberg, E. (1995). Role of auxilin in uncoating clathrin-coated vesicles. *Nature* 378, 632-635.

857 Vargas, K.J., Makani, S., Davis, T., Westphal, C.H., Castillo, P.E., and Chandra, S.S. (2014). Synucleins  
858 regulate the kinetics of synaptic vesicle endocytosis. *J Neurosci* 34, 9364-9376.

859 Venton, B.J., Zhang, H., Garris, P.A., Phillips, P.E., Sulzer, D., and Wightman, R.M. (2003). Real-time  
860 decoding of dopamine concentration changes in the caudate-putamen during tonic and phasic firing. *J*  
861 *Neurochem* 87, 1284-1295.

862 Vidyadhara, D.J., Lee, J.E., and Chandra, S.S. (2019). Role of the endolysosomal system in Parkinson's  
863 disease. *J Neurochem* 150, 487-506.

864 Vidyadhara, D.J., Yarreiphang, H., Raju, T.R., and Alladi, P.A. (2017). Admixing of MPTP-Resistant and  
865 Susceptible Mice Strains Augments Nigrostriatal Neuronal Correlates to Resist MPTP-Induced  
866 Neurodegeneration. *Mol Neurobiol* 54, 6148-6162.

867 Waldmeier, P.C., Lauber, J., Blum, W., and Richter, W.J. (1981). 3-Methoxytyramine: its suitability as an  
868 indicator of synaptic dopamine release. *Naunyn Schmiedebergs Arch Pharmacol* 315, 219-225.

869 Walters, S.H., Taylor, I.M., Shu, Z., and Michael, A.C. (2014). A novel restricted diffusion model of evoked  
870 dopamine. *ACS Chem Neurosci* 5, 776-783.

871 Wightman, R.M., and Zimmerman, J.B. (1990). Control of dopamine extracellular concentration in rat  
872 striatum by impulse flow and uptake. *Brain Res Brain Res Rev* 15, 135-144.

873 Wu, Y., O'Toole, E.T., Girard, M., Ritter, B., Messa, M., Liu, X., McPherson, P.S., Ferguson, S.M., and  
874 De Camilli, P. (2014). A dynamin 1-, dynamin 3- and clathrin-independent pathway of synaptic vesicle  
875 recycling mediated by bulk endocytosis. *Elife* 3, e01621.

876 Yang, S., Park, D., Manning, L., Hill, S.E., Cao, M., Xuan, Z., Gonzalez, I., Dong, Y., Clark, B., Shao, L.,  
877 *et al.* (2022). Presynaptic autophagy is coupled to the synaptic vesicle cycle via ATG-9. *Neuron*.

878 Yavich, L., Forsberg, M.M., Karayiorgou, M., Gogos, J.A., and Männistö, P.T. (2007). Site-specific role  
879 of catechol-O-methyltransferase in dopamine overflow within prefrontal cortex and dorsal striatum. *J*  
880 *Neurosci* 27, 10196-10209.

881 Yim, Y.I., Sun, T., Wu, L.G., Raimondi, A., De Camilli, P., Eisenberg, E., and Greene, L.E. (2010).  
882 Endocytosis and clathrin-uncoating defects at synapses of auxilin knockout mice. *Proc Natl Acad Sci U S*  
883 *A* 107, 4412-4417.

884 Yoshida, S., Hasegawa, T., Suzuki, M., Sugeno, N., Kobayashi, J., Ueyama, M., Fukuda, M., Ido-  
885 Fujibayashi, A., Sekiguchi, K., Ezura, M., *et al.* (2018). Parkinson's disease-linked DNAJC13 mutation  
886 aggravates alpha-synuclein-induced neurotoxicity through perturbation of endosomal trafficking. *Human*  
887 *Molecular Genetics* 27, 823-836.

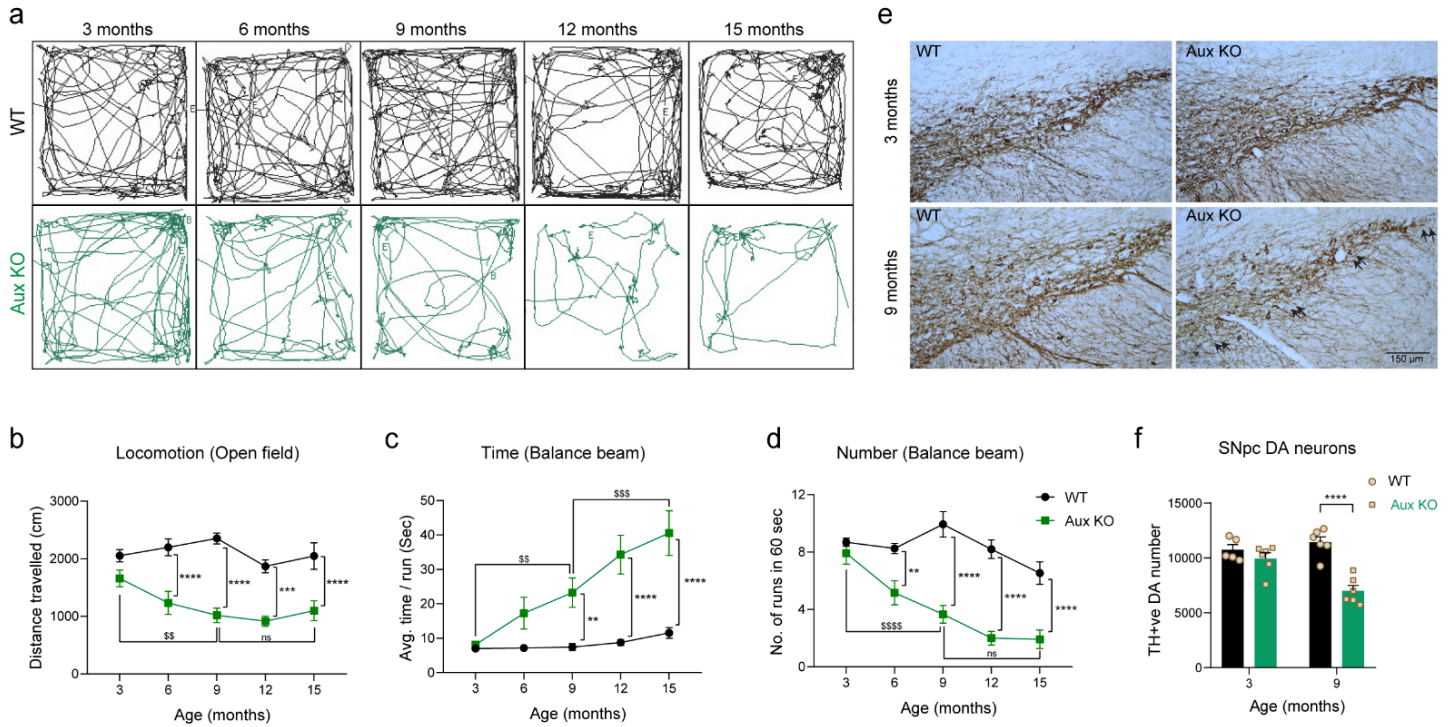

889 **Figure. 1: Auxilin KO mice develop progressive motor behavior deficits that are**  
 890 **accompanied by nigral DA neuronal loss.** **a.** Longitudinal open field locomotory behavior  
 891 tracings of WT and auxilin KO mice (Aux KO) from 3 to 15 months of age, performed at 3 months  
 892 interval. **b.** Distance travelled in open field as a function of age. At 3 months, Aux KOs (n=12)  
 893 were comparable to WT (n=16). A progressive diminishment in locomotion is seen in Aux KOs  
 894 with age, which was significant beyond 9 months compared to their performance at 3 months. **c.**  
 895 Time taken to traverse balance beam. Aux KOs take longer to cross the beam with age, with a  
 896 significant difference after 9 months of age. **d.** Number of runs performed in a minute on a balance  
 897 beam. **e.** Representative images showing TH+ve SNpc DA neurons in WT and Aux KO midbrain  
 898 sections at 3 and 9 months of age. Fewer DA neurons (arrows) were present in the SNpc of Aux  
 899 KO mice at 9 months. Scale bar: 150  $\mu$ m. **f.** Unbiased stereological counting of SNpc DA neurons.  
 900 Note a significant (~40%) loss of DA neurons is seen in 9-month-old Aux KO mice (n=5-  
 901 6/genotype). Statistics: For behavior, two-way repeated measure ANOVA followed by Sidak's  
 902 multiple comparison test was used. For stereology, Student's t-test with Welch's correction was  
 903 used. \*\* $p < 0.01$ , \*\*\* $p < 0.001$ , \*\*\*\* $p < 0.0001$ , \$\$ $p < 0.01$ , \$\$\$\$ $p < 0.0001$ , \$\$ $p < 0.01$ , \$\$\$\$ $p < 0.0001$ ,  
 904 ns = not significant.

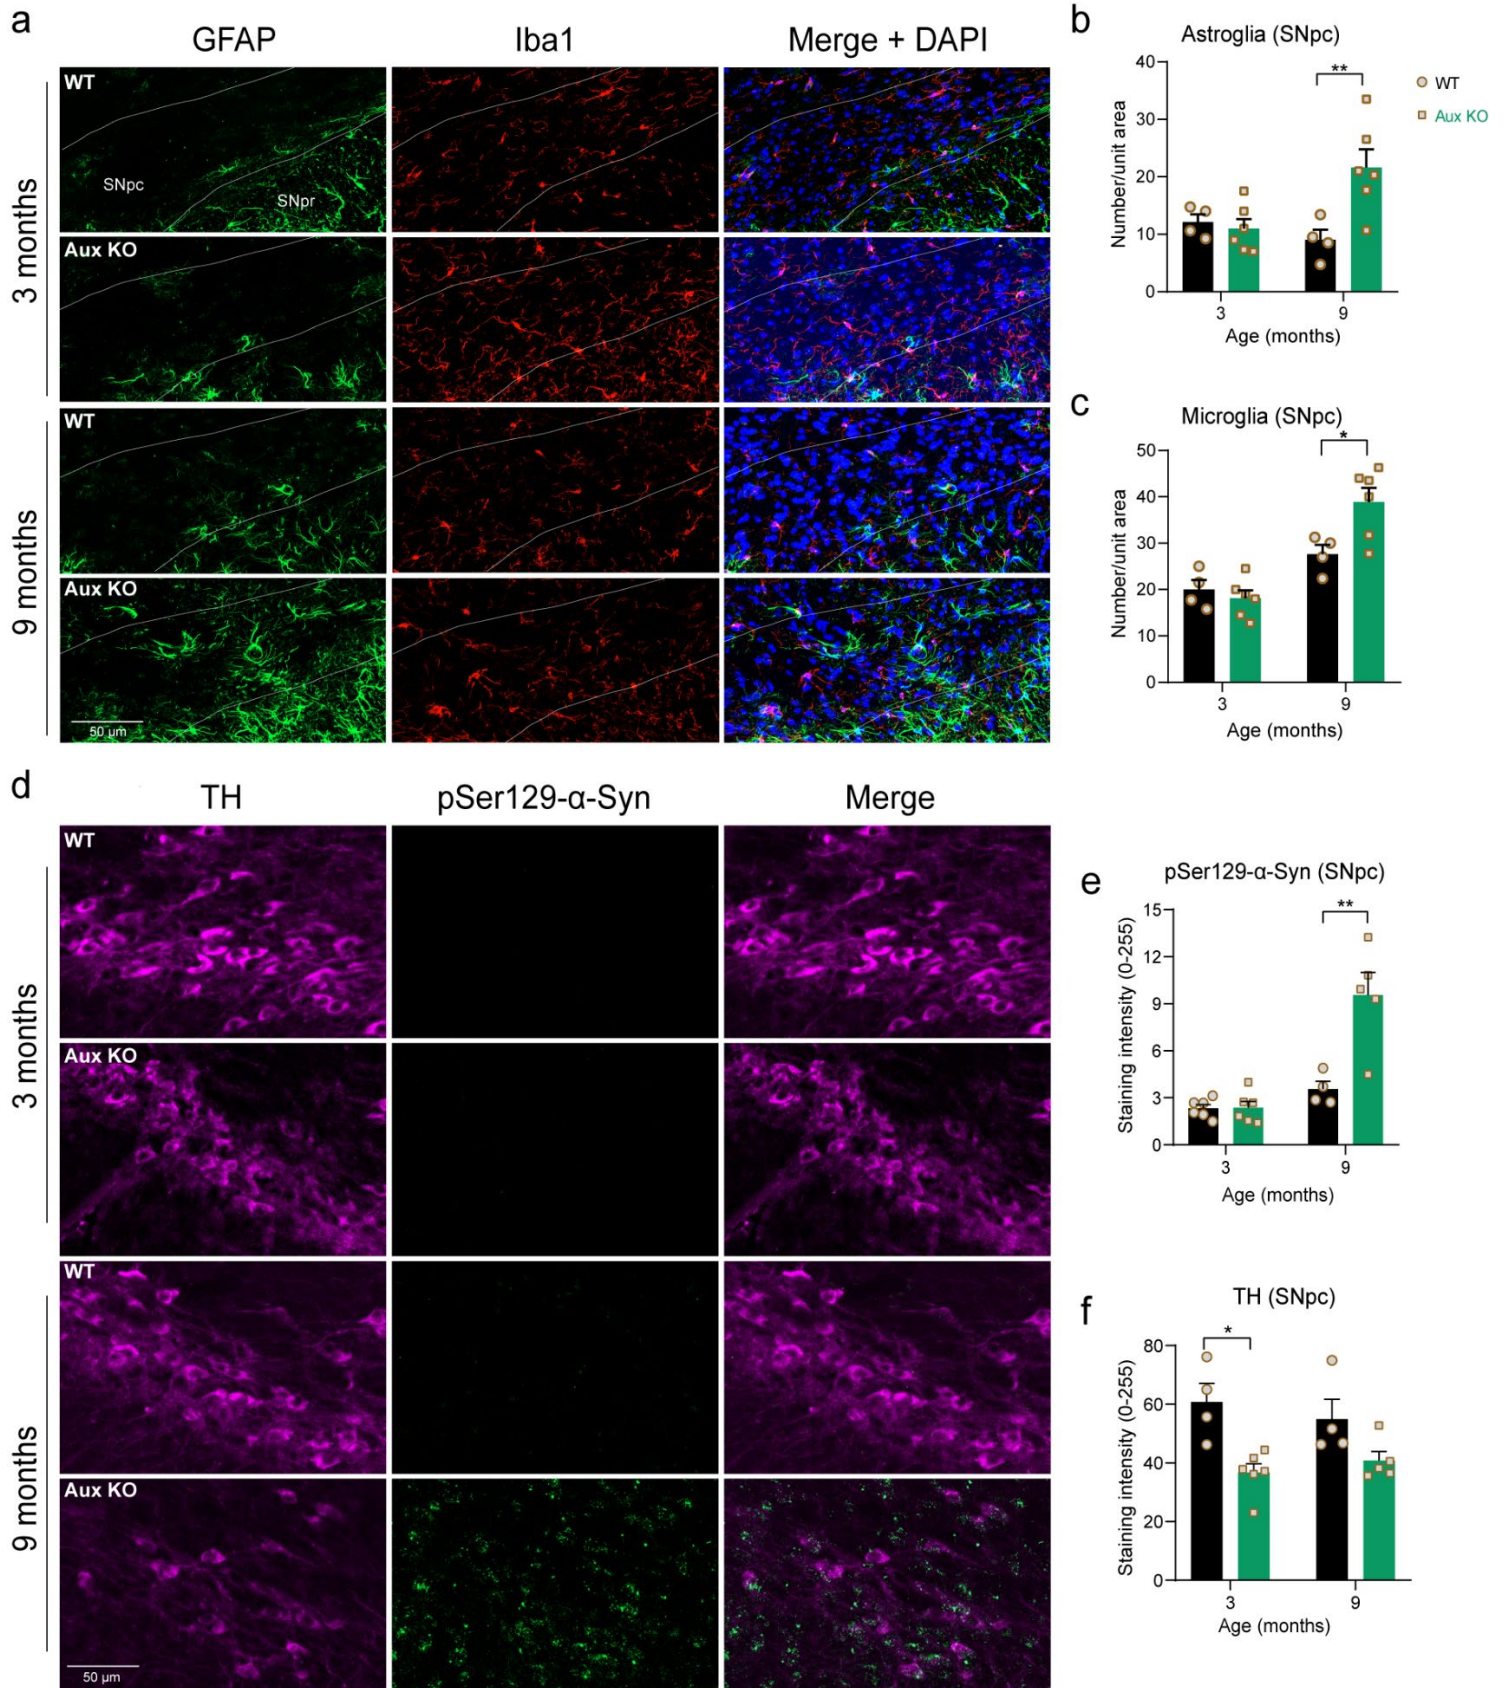

906 **Figure. 2: Aged auxilin KO mice exhibit gliosis and  $\alpha$ -synuclein pathology.** **a.** Representative  
907 images of SNpc and SN pars reticulata (SNpr) of WT and Aux KO mice at 3 and 9 months (n=5-  
908 6/genotype) immunostained for the astroglial marker GFAP (green) and microglial marker Iba1  
909 (red). Dashed line demarcates SNpc from SNpr. Scale bar: 50  $\mu$ m **b.** Quantitation of GFAP+ve  
910 cells, show a significant astrogliosis at 9 months, but not at 3 months of age in the SNpc. **c.**  
911 Quantitation of Iba1+ve cells, show microgliosis in the SNpc of Aux KOs at 9 months. **d.**  
912 Representative images of the SNpc immunostained for pSer129- $\alpha$ -synuclein (green), a marker of  
913  $\alpha$ -synuclein pathology, co-stained with DA marker TH (magenta). Scale bar: 50  $\mu$ m. **e.**  
914 Quantitation of pSer129- $\alpha$ -synuclein +ve punctate aggregates in SNpc, which showed an increase  
915 at 9-month-old Aux KOs, but not at 3 months. **f.** Quantitation of TH staining intensity in SNpc,  
916 which showed a moderate decrease at 3 months in auxilin KO mice but not at 9 months, suggesting  
917 retention of TH phenotype in the surviving neurons. Statistics: Student's t-test with Welch's  
918 correction. \* $p < 0.05$ , \*\* $p < 0.01$ .

919

920

921

922

923

924

925

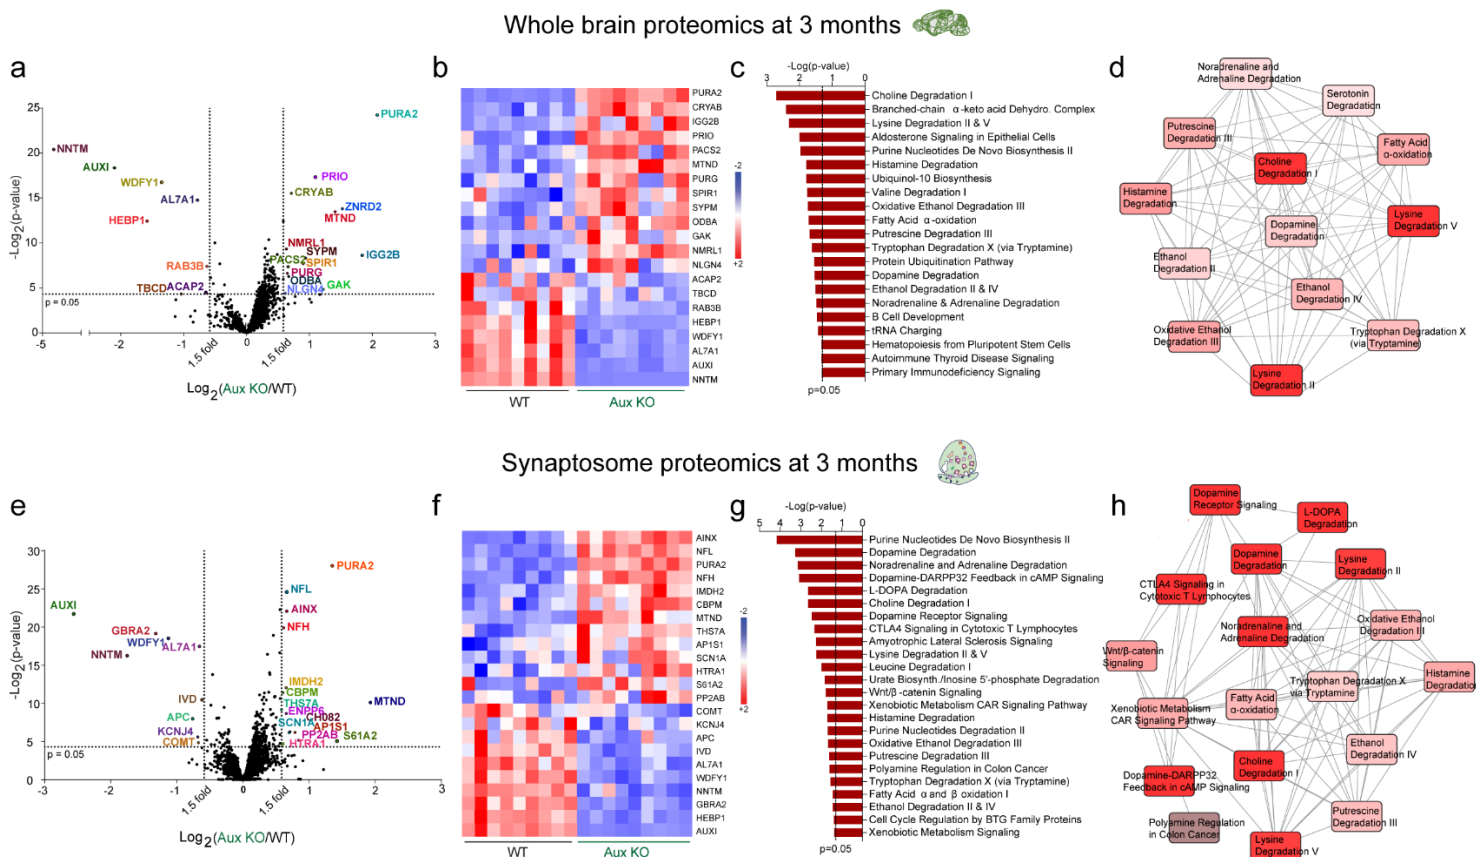

927 **Figure 3: Whole brain and synaptosome proteomics reveal dopamine degradation**  
 928 **dysfunction in young auxilin KO mice.** **a.** Volcano plot of whole brain proteome of Aux KO  
 929 compared to WT (age=3 months, n=3 mice/genotype). Proteins that exhibit a 1.5-fold change  
 930 (vertical dotted lines) and a p-value of 0.05 (Student's t-test) or lesser (horizontal dotted line) were  
 931 considered as significantly changed. Among the 22 proteins that significantly changed, 8 were  
 932 decreased (left quadrant) and 14 were increased (right quadrant). **b.** Heat map of significantly  
 933 changed proteins in whole brain homogenates of WT and Aux KO for all 9 technical replicates  
 934 (3 technical replicates/mouse). Red indicates an increase (+2) and blue indicates decreased levels  
 935 (-2). **c.** Pathways that are significantly ( $\text{p} < 0.05$ ) affected in whole brain of Aux KO as determined  
 936 by IPA. **d.** Diagram showing the overlap of significantly affected pathways, where intense red  
 937 depicts most affected and light red depicts moderately affected pathways. **e.** Volcano plot of  
 938 synaptosome proteome of Aux KO compared to WT (age=3 months, n=3 mice/genotype). Out of  
 939 24 proteins that were significantly changed (1.5-fold,  $\text{p} < 0.05$ , Student's t-test), 9 were decreased  
 940 (left quadrant) and 15 were increased (right quadrant). **f.** Heat map of significantly changed  
 941 proteins in synaptosome preparations from Aux KO in comparison to WT for each technical  
 942 replicate. Red indicates an increase (+2) and blue indicates decreased levels (-2). **g.** Significantly  
 943 affected pathways due to synaptosome proteomic changes as determined by IPA. **h.** Overlap of  
 944 significantly affected pathways showing highly affected (intense red) and moderately affected  
 945 (light red) pathways.



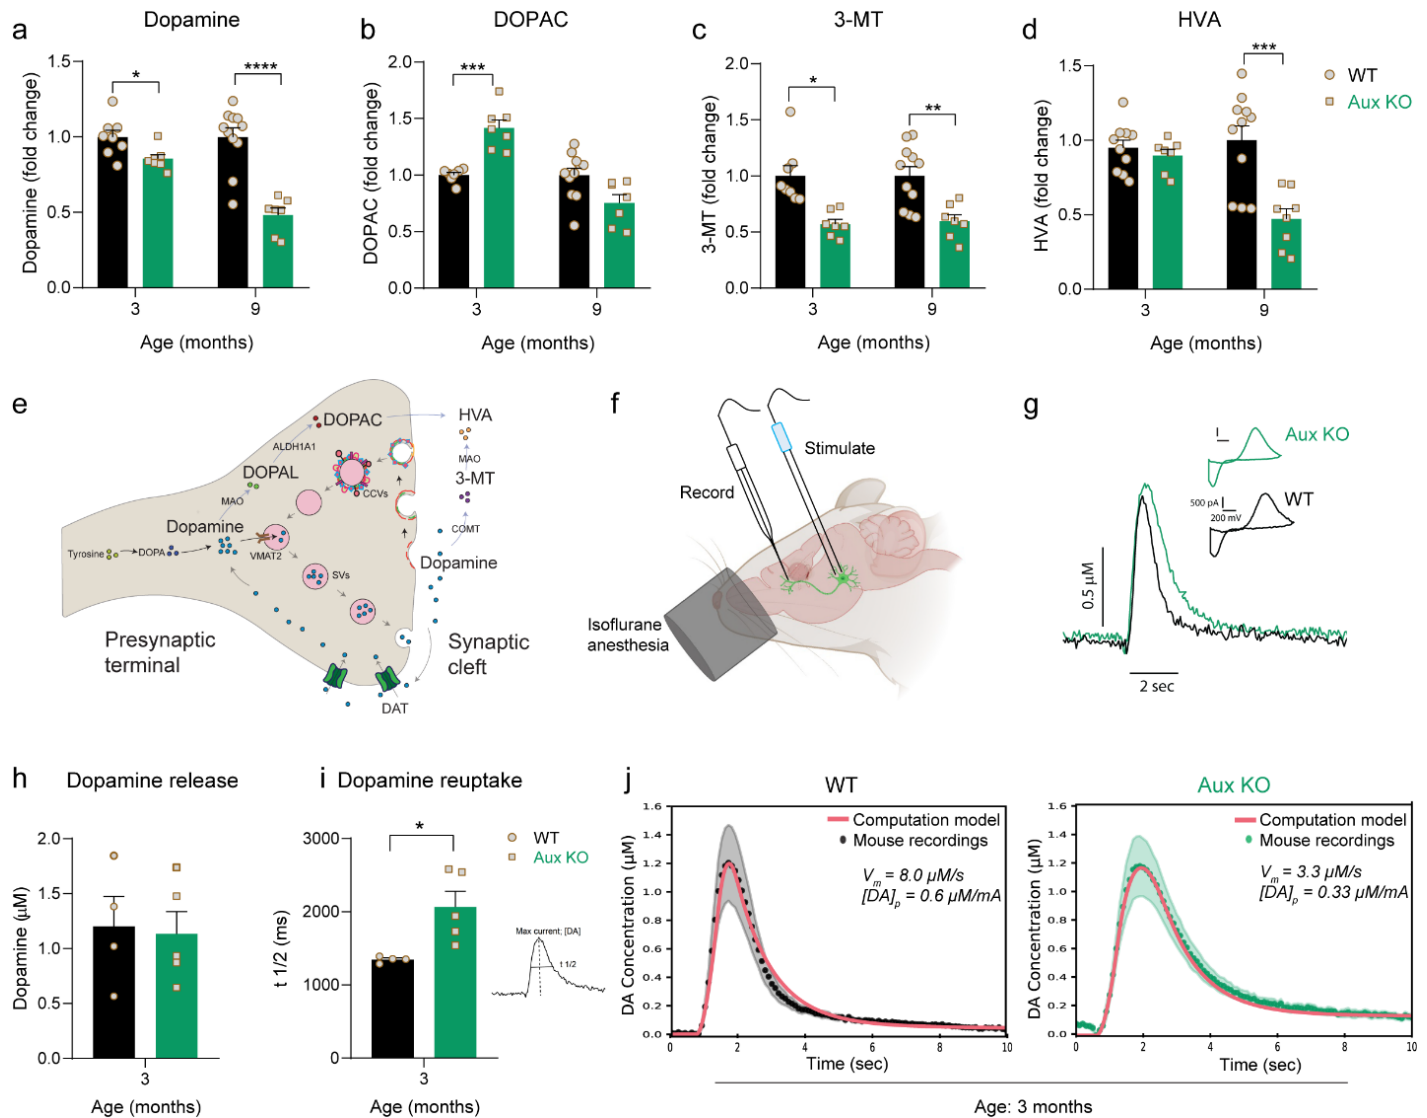

947 **Figure 4: Dopamine catabolism and dopamine reuptake deficits in young auxilin KO mice.**

948 **a.** Dopamine levels in the dorsal striatum of WT and Aux KO mice. Note a modest decrease in  
 949 dopamine at 3 months, but a larger decrease at 9 months of age (n=7-11 mice/genotype). **b.**  
 950 DOPAC levels in the dorsal striatum. At 3 months, a significant increase in the intracellular  
 951 dopamine catabolite DOPAC is seen in Aux KOs, whereas no change is observed at 9 months. **c.**  
 952 3-MT levels in the dorsal striatum. An extra-synaptic dopamine catabolite 3-MT was decrease both  
 953 at 3 and 9 months of age in Aux KOs. **d.** HVA levels in the dorsal striatum. HVA, another extra-  
 954 synaptic dopamine catabolite did not change at 3 months but decreased significantly at 9 months  
 955 in Aux KO mice. **e.** Schematic showing compartmentalization of dopamine and its catabolites in  
 956 intra- and extra-synaptic space. **f.** Schematic showing the location of FSCV recording electrode in  
 957 the dorsal striatum and the bipolar stimulating electrode in the ventral midbrain of mice under  
 958 isoflurane anesthesia. **g.** Example trace of evoked dopamine release following stimulation of  
 959 midbrain DA neurons by 30 pulses at a constant 50-Hz frequency in 3-month-old Aux KO and  
 960 WT mice (scale: y axis, 0.5 μM dopamine; x axis, 2 sec). **h.** Dopamine release in the dorsal  
 961 striatum. No significant change in dopamine release was seen in Aux KO mice when compared to  
 962 WT (n=4-5/genotype). **i.** Dopamine reuptake in the dorsal striatum. Reuptake kinetics measured

963 by time taken to clear half the dopamine from its peak levels ( $t_{1/2}$ ) was significantly delayed in  
964 Aux KO mice. Statistics: Student's t-test with Welch's correction. **j.** Best-fits of computational  
965 model of dopamine (DA) release (red lines) to averaged FSCV recordings in the dorsal striatum  
966 of WT (Black dots;  $R^2 = 0.98$ ,  $n = 4$ ) and Aux KO (Green dots;  $R^2 = 0.99$ ,  $n = 5$ ) mice.  
967 Black/green ribbons report SEM. Dopamine release from Aux KO mice is closely fit by a ~60%  
968 reduction in DAT activity (parameter  $V_m$ ) and a ~45% reduction in dopamine release per electrical  
969 pulse (parameter  $[DA]_p$ ).  $*p < 0.05$ ,  $***p < 0.001$ ,  $****p < 0.0001$ .

970

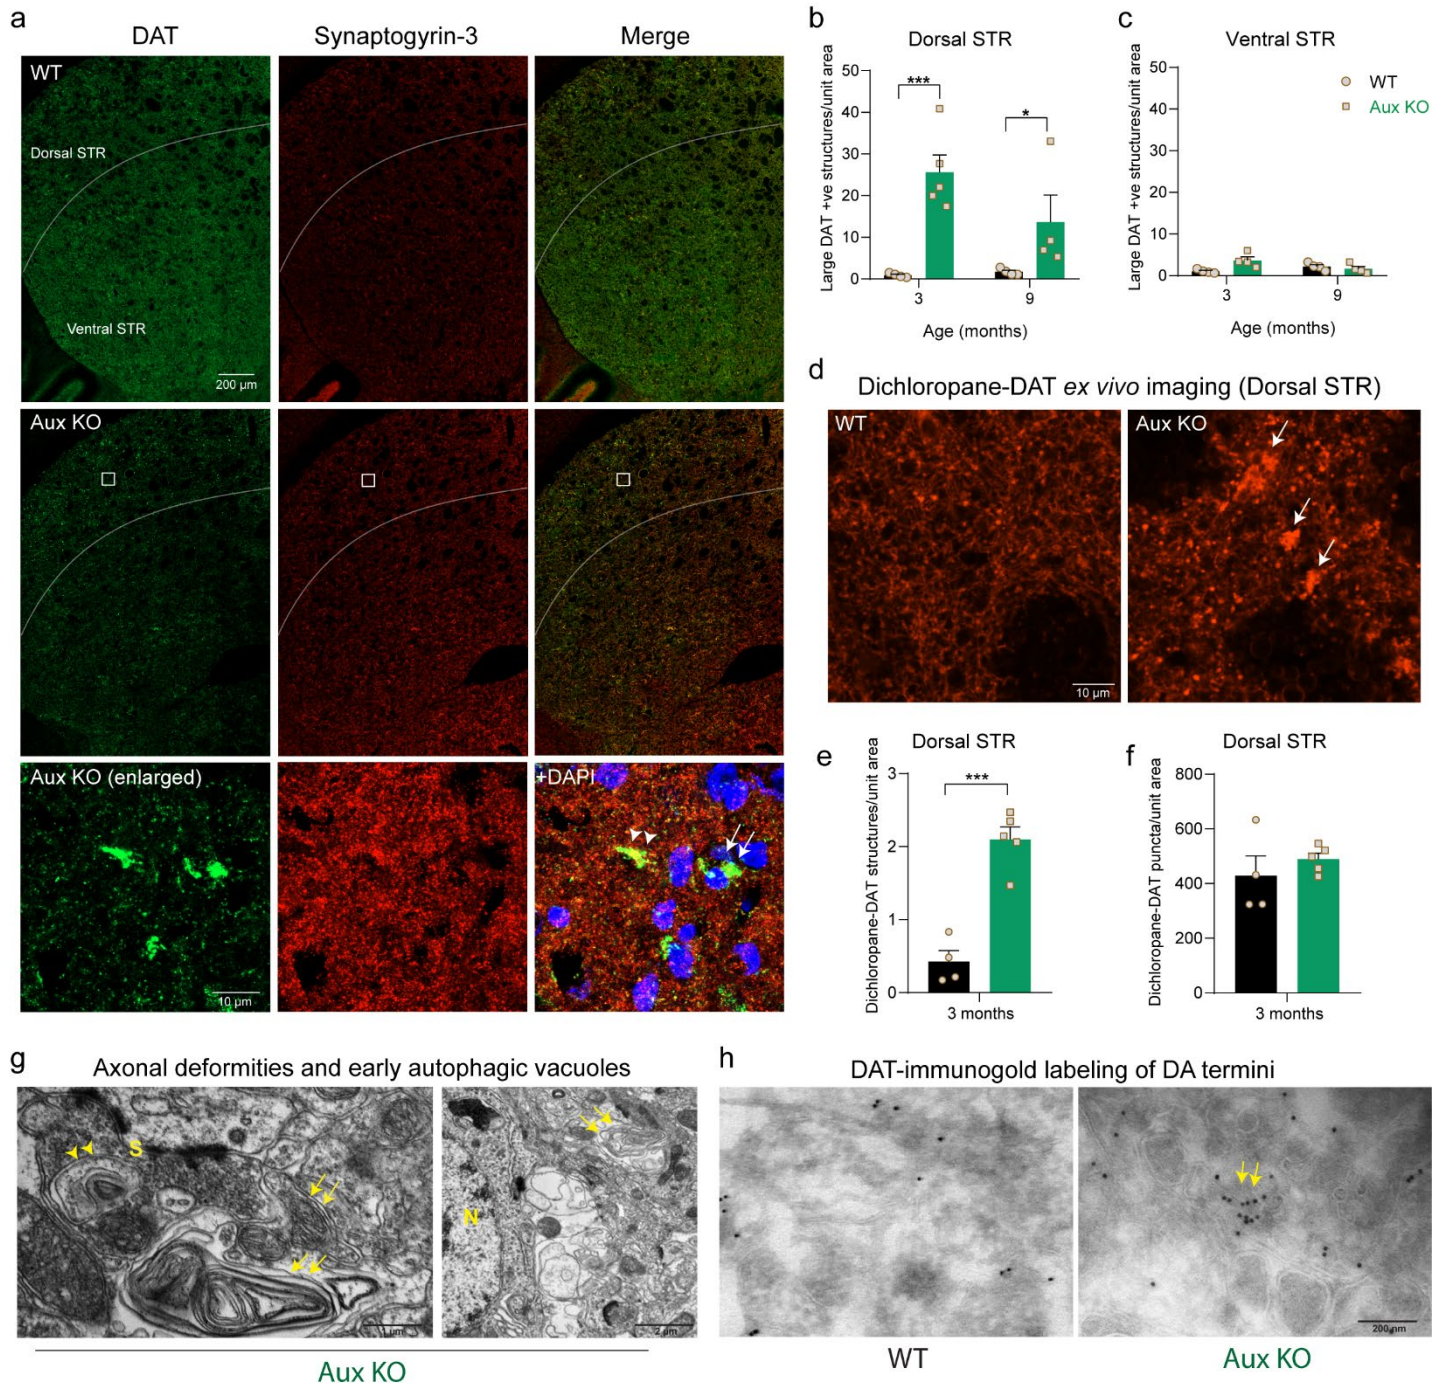

972 **Figure 5: DAT+ve axonal deformities in the dorsal striatum of auxilin KOs.** **a.** Representative  
 973 images of dorsal and the ventral striatum (STR) in WT and Aux KO mice, immunostained for  
 974 DAT and synaptogyrin-3. Note large DAT+ve structures in the dorsal STR of Aux KOs, that are  
 975 absent in the ventral STR. Scale bar: 200  $\mu$ m. These DAT+ve structures were juxtaposed to  
 976 presynaptic sites as seen by colocalization with synaptogyrin-3 (Aux KO, enlarged, arrowhead),  
 977 as well as in the soma marked by DAPI staining (Aux KO, enlarged, arrow). Scale bar: 10  $\mu$ m. **b.**  
 978 Number of DAT+ve structures/unit area in the dorsal striatum. Aux KO showed a significantly  
 979 higher DAT+ve structures both at 3 and 9 months. **c.** Number of DAT+ve structures in the ventral

980 striatum. DAT+ve structures were not observed in ventral striatum in Aux KOs. **d.** Representative  
981 images of *ex vivo* staining of dichloropane–rhodamine red-X in the dorsal striatum of WT and Aux  
982 KO mice. DA axonal projections and presynaptic sites appear as small puncta, whereas axonal  
983 deformities appear as large dichloropane-DAT+ve structures (arrows). Scale bar: 10  $\mu\text{m}$  **e.** Number  
984 of large dichloropane-bound DAT+ve structures/unit area in the dorsal striatum, were significantly  
985 higher in Aux KOs. **f.** Number of small dichloropane-bound DAT+ve puncta, was not altered in  
986 Aux KO dorsal striatum in comparison to WT. **g.** EM of dorsal striatum of Aux KO mice showing  
987 large axonal whirl like deformities (arrows), which were present ubiquitously, closer to both  
988 synaptic terminals (S) and soma (N: nuclei). Early autophagic vacuole like structures were also  
989 seen in dorsal striatum (arrow heads), closer to axonal whirls. Scale bar: 1  $\mu\text{m}$  and 2  $\mu\text{m}$ . **h.** DAT-  
990 immunogold labeling of dorsal striatum that mark only DA axonal termini showed dispersed  
991 labeling in WT. In Aux KOs, DAT-immunogold clusters were seen in the dorsal striatum (arrows).  
992 Scale bar: 200 nm. Statistics: Student's t-test with Welch's correction. \*\*\* $p < 0.001$ .

993

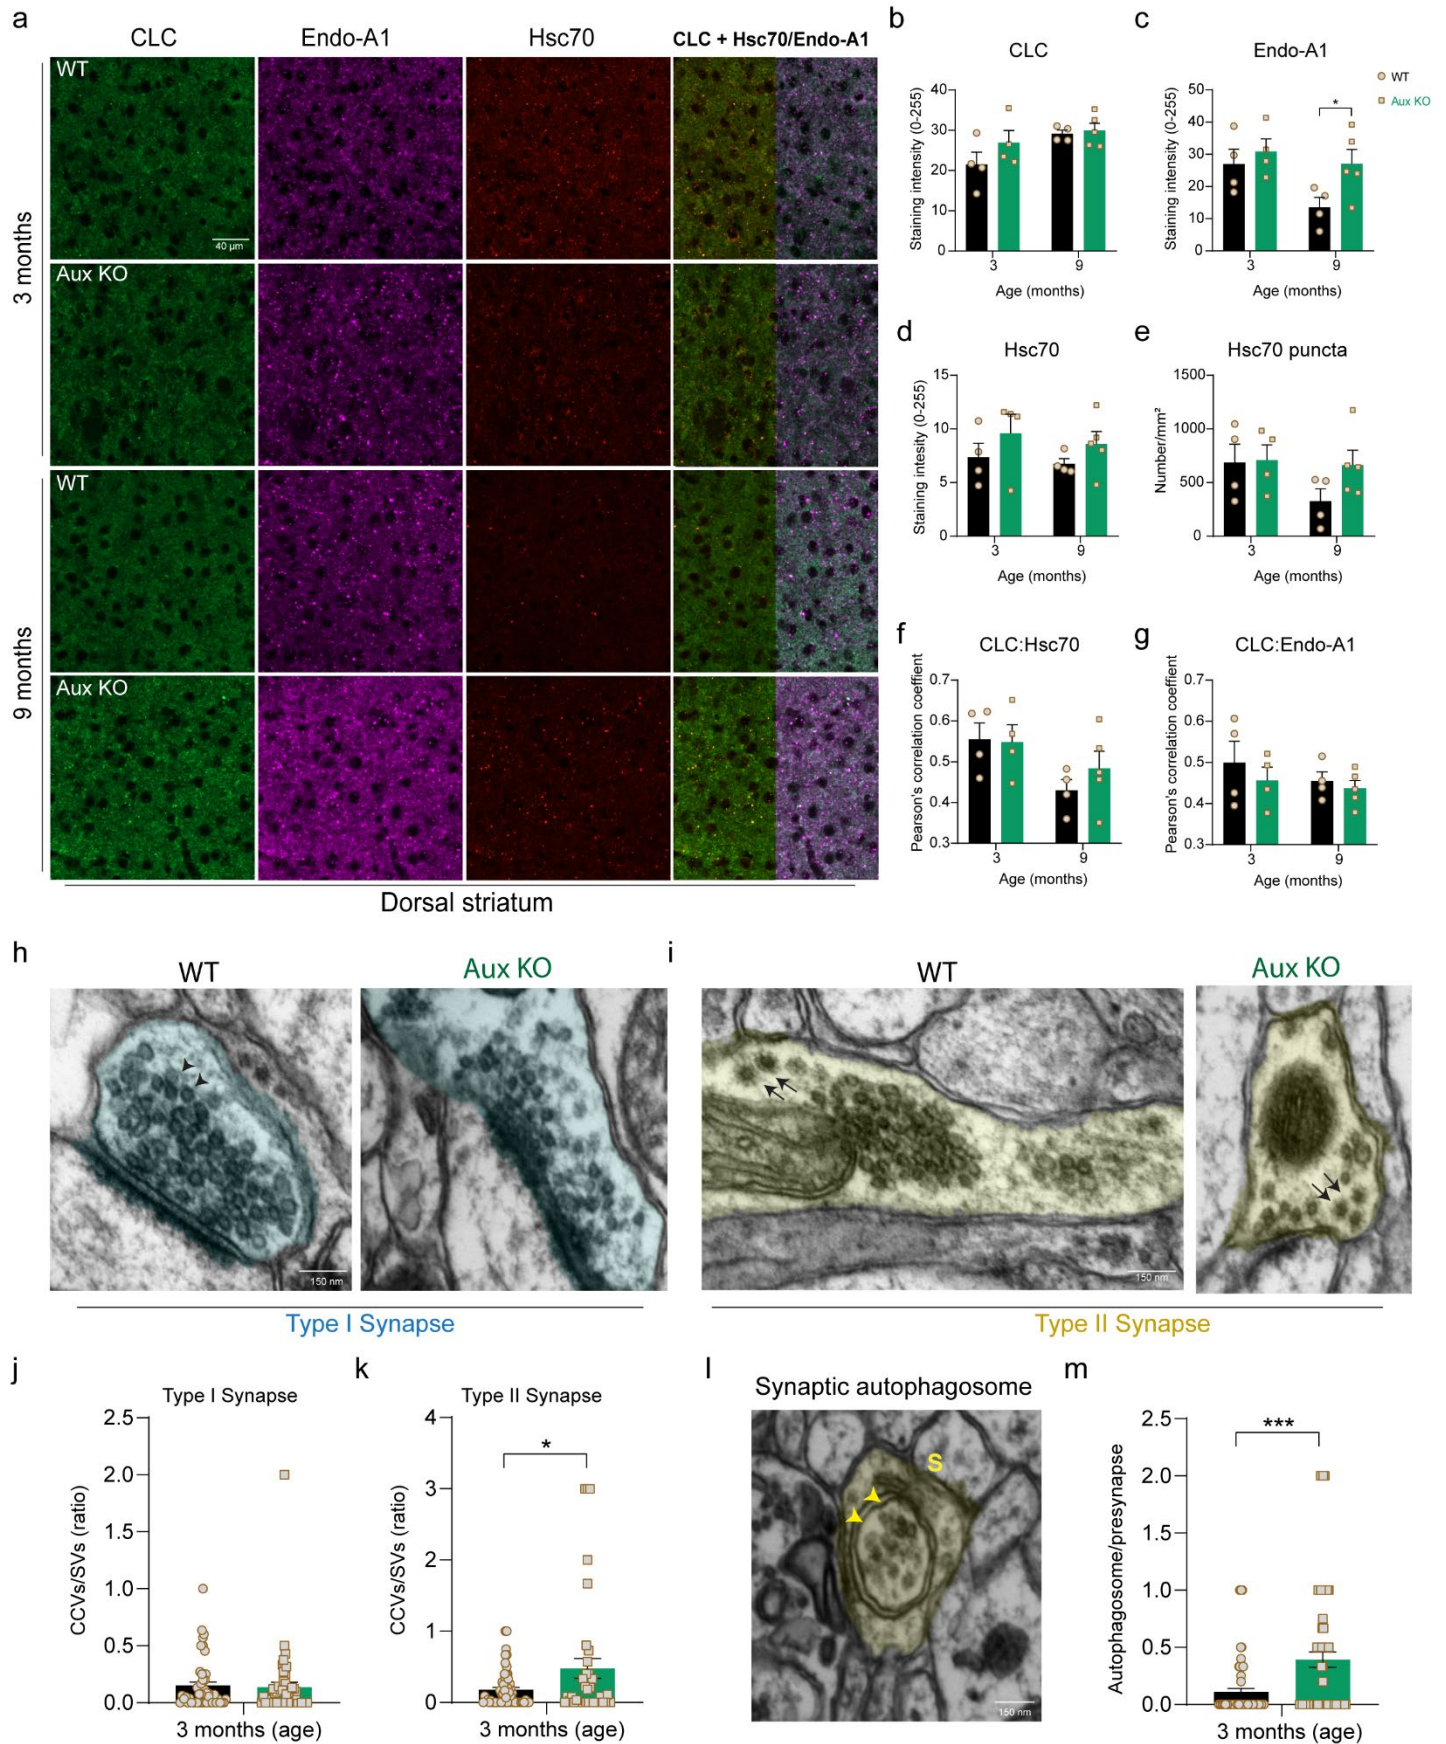

995 **Figure. 6: CCVs are cleared by synaptic autophagy in Auxilin KOs.** **a.** Representative images  
996 of dorsal striatum immunostained for clathrin light chain (CLC), endophilin-A1 (Endo-A1) and  
997 Hsc70, in WT and Aux KO mice at 3 and 9 months of age. Scale bar: 40  $\mu\text{m}$ . **b.** CLC expression  
998 the dorsal striatum, was not altered in Aux KOs. **c.** Endo-A1 expression in the dorsal striatum, was  
999 not changed at 3 months but was increased at 9 months in Aux KOs. **d.** Hsc70 expression in the  
1000 dorsal striatum, which was also not altered. **e.** Number of Hsc70+ve puncta in the dorsal striatum  
1001 is unaltered. **f.** Colocalization of Hsc70 with CLC in WT and Aux KOs. **g.** Endo-A1 colocalization  
1002 with CLC. **h.** Representative EM image of a Type I excitatory presynapse with SVs (arrow heads)  
1003 from dorsal striatum of WT and Aux KO. Scale bar: 150  $\mu\text{m}$ . **i.** Representative EM image of a  
1004 Type II inhibitory presynapse in the dorsal striatum of WT and Aux KO mice with SVs and CCVs  
1005 (arrows). Note Aux KO presynapse showing a decrease accumulation of CCVs, accompanied by  
1006 a decrease in SVs. Scale bar: 150  $\mu\text{m}$ . **j.** The CCV to SV ratio in Type I synapses of dorsal striatum  
1007 (Age: 3 months). This ratio was not altered in Aux KOs. **k.** The CCV to SV ratio in Type II  
1008 synapses of dorsal striatum, which was significantly increased in Aux KOs in comparison to WT.  
1009 **l.** EM image of a Type I synaptic terminal (S) in the dorsal striatum of Aux KOs showing double  
1010 membraned autophagosomes containing CCVs (arrows). **m.** Number of autophagosomes per  
1011 presynaptic terminal in the dorsal striatum, which was significantly increased in Aux KOs  
1012 compared to WT (Age: 3 months). Statistics: Student's t-test with Welch's correction.  $*p < 0.05$ ,  
1013  $***p < 0.001$ .

1014

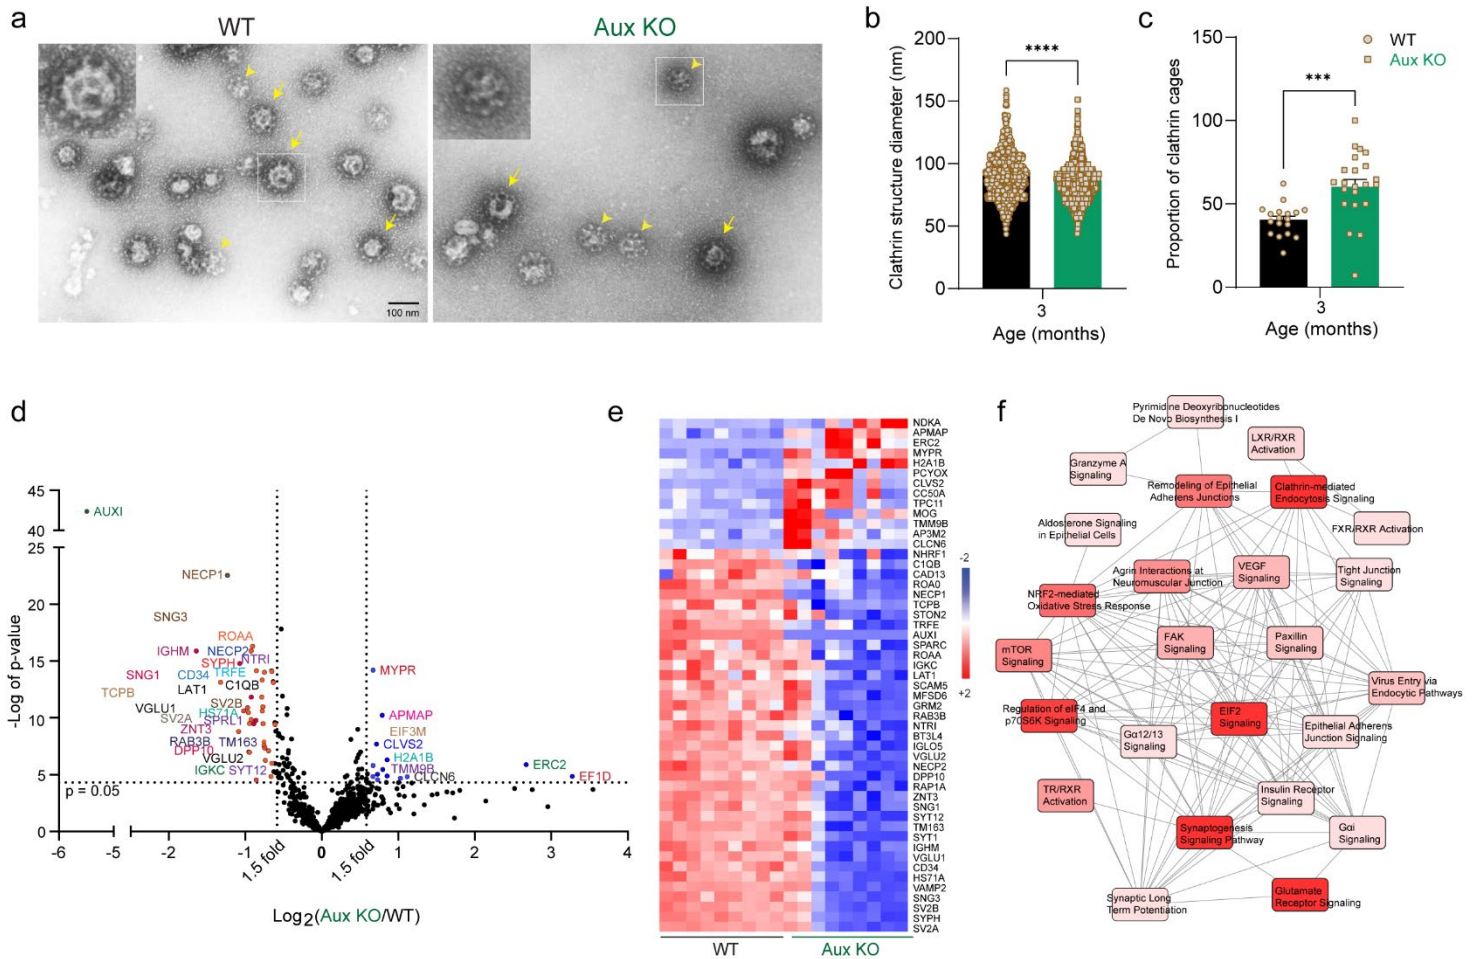

1016 **Figure 7: EM and proteomics of CCVs reveals SVs with variable membrane composition in**  
 1017 **auxilin KOs. a.** Representative EM images of CCV preparation showing CCVs (arrows) and  
 1018 empty clathrin cages (arrow heads) in WT and Aux KO mice. Scale bar: 100 nm. **b.** Diameter of  
 1019 clathrin structures (CCVs + clathrin cages), which was significantly smaller in Aux KO samples  
 1020 compared to WT. **c.** Proportion of clathrin in WT and Aux KO mice. Note, Aux KOs show  
 1021 significantly larger proportion of clathrin cages. **d.** Volcano plot of CCV proteome of Aux KOs in  
 1022 comparison to WT (n=14 mice/experiment, N=3 experiments/genotype). Proteins that were  
 1023 changed 1.5-fold (vertical dotted lines) with a p-value of 0.05 (Student's t-test) or lower (horizontal  
 1024 dotted line) were considered as significantly changed. Among the 49 proteins that were  
 1025 significantly changed, 37 were decreased and 12 were increased. **e.** Heat map of significantly  
 1026 changed proteins in Aux KOs in comparison to WT for each experiment (3 technical replicates per  
 1027 experiment). Red indicates increased expression (+2), and blue indicates a decrease (-2). **f.**  
 1028 Pathways that are significantly affected ( $p < 0.05$ ) in Aux KO mice due to CCV proteome changes,  
 1029 and their overlap. Pathways depicted in intense red are highly affected, whereas the light red are  
 1030 moderately affected. Statistics: Student's t-test with Welch's correction. \*\*\* $p < 0.001$ ,  
 1031 \*\*\*\* $p < 0.0001$ .

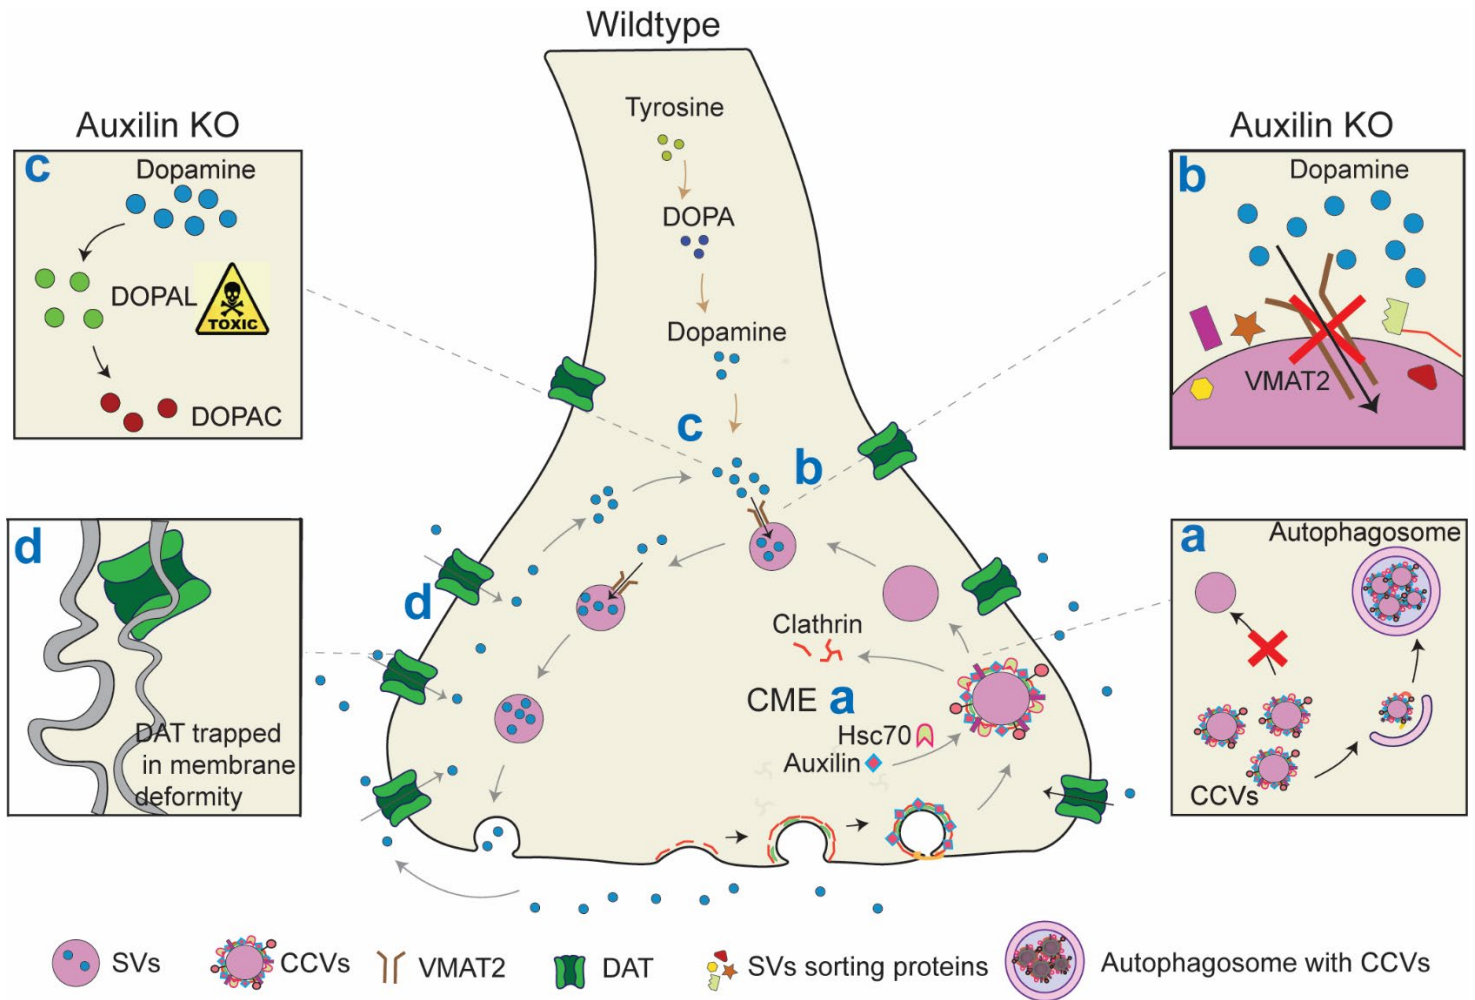

1033 **Figure 8: Schematic showing dopamine compartmentalization defects in a DA presynapse**  
 1034 **of auxilin KO mice. a.** In a WT DA presynapse, after release of dopamine, SVs are recycled  
 1035 principally through CME. Clathrin forms a coat on the nascent SV membrane to form CCVs with  
 1036 the aid of adaptors. Auxilin recruits Hsc70 to CCVs and functions in its uncoating to generate SVs.  
 1037 In Aux KO mice, CCV uncoating is affected, leading to their accumulation and their subsequent  
 1038 clearance by an enhanced synaptic autophagy. Consequently, there is an imbalance in CCV to SV  
 1039 ratio. **b.** In WT DA synapses, dopamine once synthesized is immediately sequestered into the SVs  
 1040 by the vesicular transporter VMAT2. Aux KO mice have SVs with varied protein stoichiometry  
 1041 and a decrease in the copy number of vesicular transporters, hindering dopamine sequestration to  
 1042 SVs. **c.** In WT, there is minimal cytosolic dopamine present. In Aux KO, due to aforementioned  
 1043 events, there is an elevation in cytosolic dopamine, which is oxidized to its toxic intermediates  
 1044 such as DOPAL and DOPAC. **d.** Normally, DAT plays a pivotal role in dopamine reuptake and  
 1045 replenishing presynaptic vesicular dopamine for future release. In Aux KOs, DAT is misrouted  
 1046 and trapped in the axonal membrane whirls/deformities in the DA projections, compromising  
 1047 dopamine reuptake.

1048



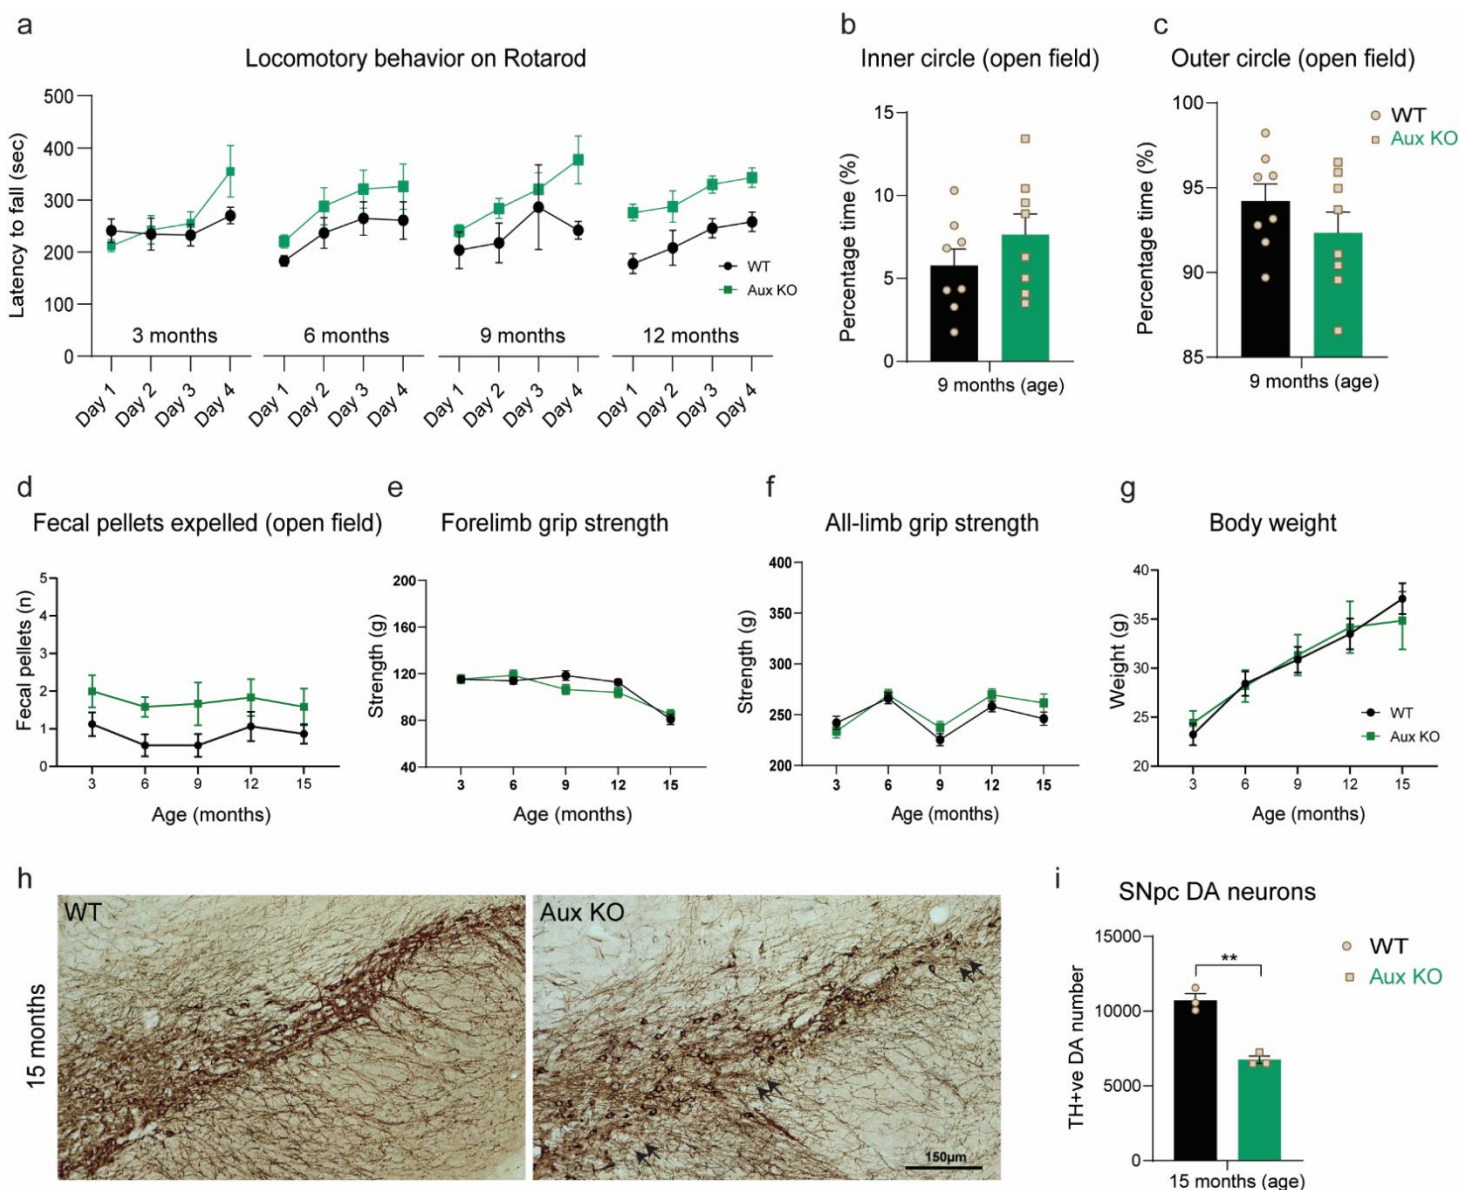

1050 **Supplementary Figure 1: Auxilin KO mice show selective behavioral deficits** **a.** Motor  
 1051 coordination on Rotarod measured as latency to fall. Aux KOs did not show significant alteration  
 1052 in this behavioral test when compared to WT. **b.** Percentage time spent in inner circle of the open  
 1053 field. This is a measure of anxiety and was not different from WT at 9 months in Aux KOs, even  
 1054 though motor deficits were apparent. **c.** Percentage time spent in outer circle of the open field. **d.**  
 1055 Number of fecal pellets expelled during open field behavior, which did not change significantly  
 1056 between WT and Aux KOs across age. **e.** Forelimb grip strength measured as a function of age in  
 1057 WT and Aux KOs. **f.** All-limb grip strength was also not affected. **g.** Body weight of WT and Aux  
 1058 KOs as a function of age. **h.** Representative images of TH+ve DA neurons in SNpc of WT and  
 1059 Aux KO mice at 15 months of age. Note a loss of DA neurons in the SNpc of Aux KO mice  
 1060 (arrows). Scale bar: 150  $\mu$ m. **i.** Stereological counting of SNpc DA neurons, which revealed a  
 1061 significant loss of DA neurons in Aux KO mice at 15 months of age. Statistics: For age-related  
 1062 behavior, two-way repeated measure ANOVA followed by Sidak's multiple comparison test was  
 1063 used. For others, Student's t-test with Welch's correction was used. \*\* $p < 0.01$ .

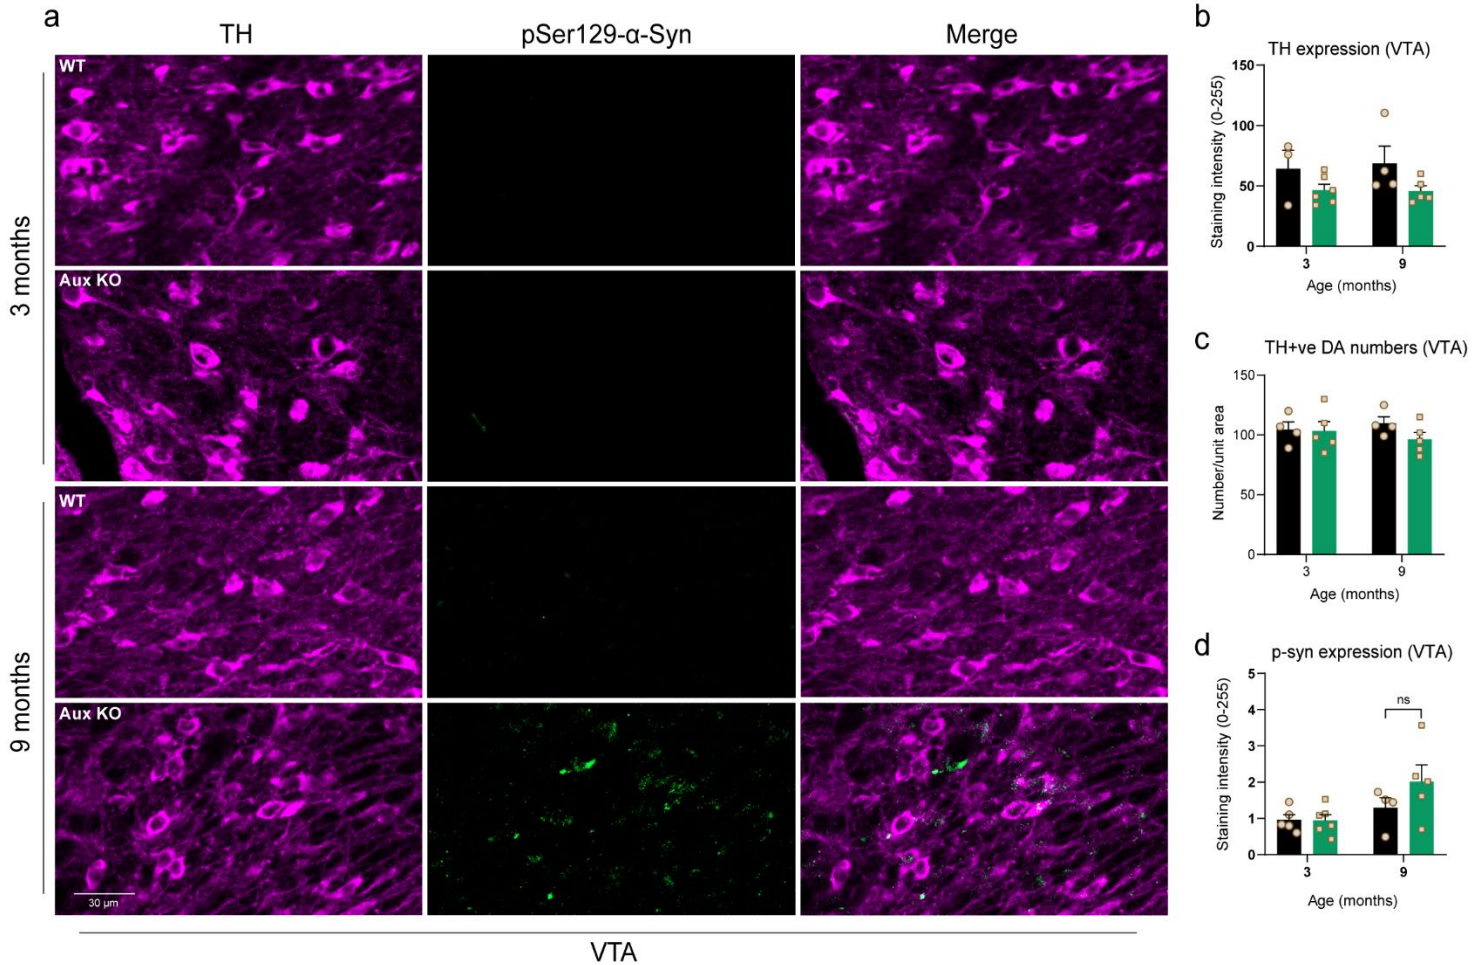

1065 **Supplementary Figure. 2: VTA was relatively preserved in auxilin KOs.** **a.** Representative  
 1066 images VTA immunostained for  $\alpha$ -synuclein aggregation marker pSer129- $\alpha$ -synuclein (green) co-  
 1067 labelled with DA marker TH, at 3 and 9 months in WT and Aux KOs. Scale bar: 30  $\mu$ m. **b.** TH  
 1068 expression in VTA, which did not change with age in Aux KOs. **c.** Number of TH+ve DA neurons  
 1069 in VTA, which was not altered in Aux KO mice. **d.** p-Ser 129- $\alpha$ -synuclein expression in VTA,  
 1070 which showed a trend of higher expression at 9 months but did not reach significance in Aux KOs.  
 1071 Statistics: Student's t-test with Welch's correction.

1072

1073

### Synaptosome proteomics at 9 months

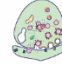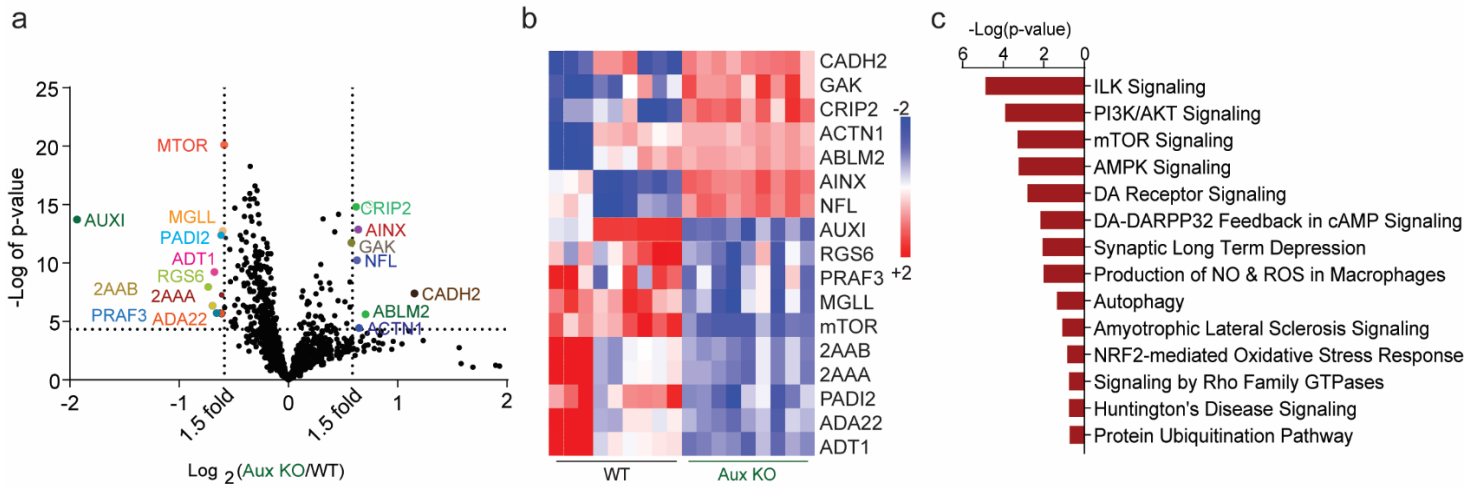

1075 **Supplementary Figure. 3: Synaptosome proteomics at 9 months revealed several PD-linked**  
 1076 **proteins and pathways to be altered.** **a.** Volcano plot of synaptosome proteome of 9-month-old  
 1077 Aux KO compared to WT (n=3 mice/genotype). Proteins that were altered greater than 1.5-fold  
 1078 (vertical dotted lines) with a p-value of 0.05 (Student's t-test) or lesser (horizontal dotted line)  
 1079 were considered as significantly changed. Among 17 proteins that significantly changed, 10 were  
 1080 decreased (left) and 7 were increased (right). **b.** Heat map of significantly changed proteins in  
 1081 synaptosomes of Aux KO in comparison to WT depicted for each technical replicate (3 technical  
 1082 replicates/mouse). Red indicates an increase (+2) and blue indicates decreased levels (-2). **c.**  
 1083 Pathways that are significantly (p<0.05) affected in whole brain synaptosomes of Aux KO as  
 1084 determined by IPA.

1085

1086

1087

1088

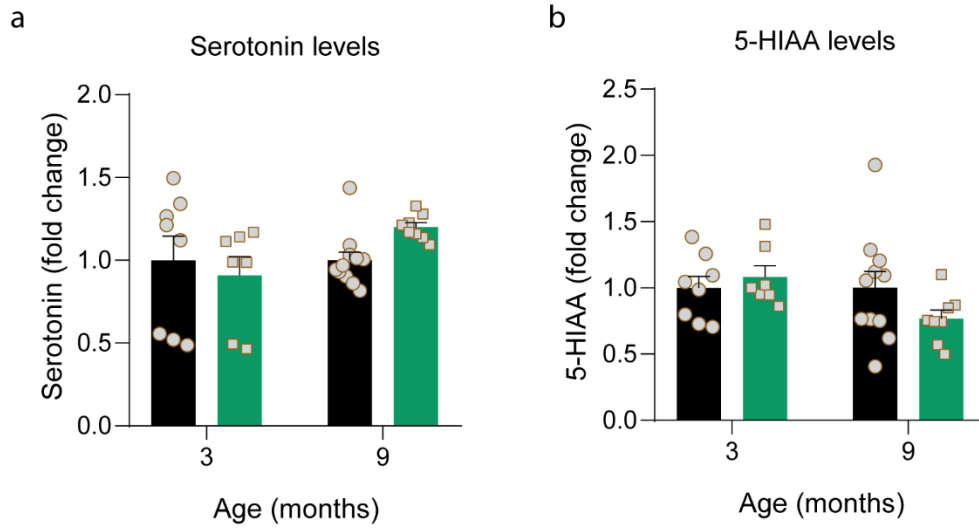

1090 **Supplementary Figure. 4: Serotonin and its metabolites were unaltered in auxilin KO brains.**  
1091 **a.** Serotonin levels in the dorsal striatum of WT and Aux KOs at 3 and 9 months, as measured by  
1092 HPLC, which was not altered in Aux KO mice. **b.** Levels of 5-HIAA, a serotonin metabolite, was  
1093 also unaltered. Statistics: Student's t-test with Welch's correction.

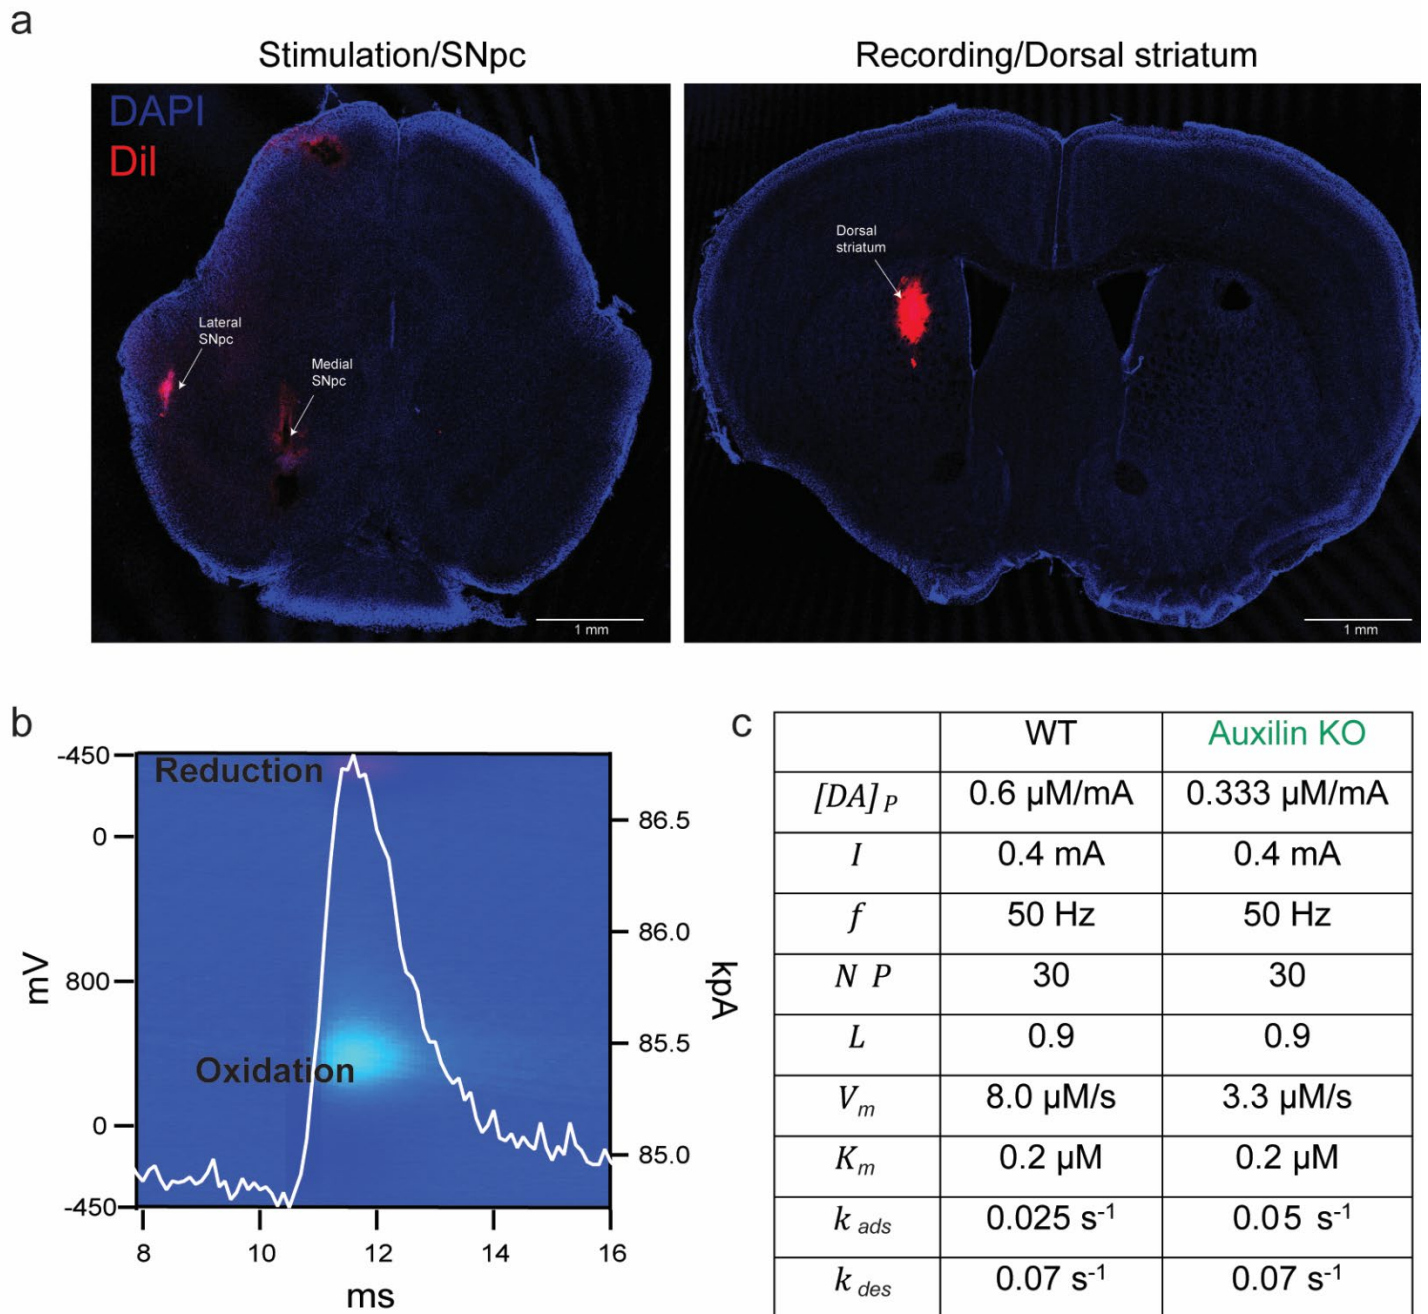

1095 **Supplementary Figure. 5: FSCV recording.** **a.** Representative images of coronal mouse brain  
 1096 sections showing the location of the bipolar stimulating electrode in the SNpc and the FSCV  
 1097 recording electrode in the dorsal striatum (STR), as marked by DiI staining (DiI: red, DAPI: blue).  
 1098 Scale bar: 1mm **b.** The 3-dimensional pseudocolor plot showing oxidation (cyan) and reduction  
 1099 (red) of dopamine. **c.** Best fit parameters of the dopamine computational model to fit FSCV  
 1100 recordings.

1101

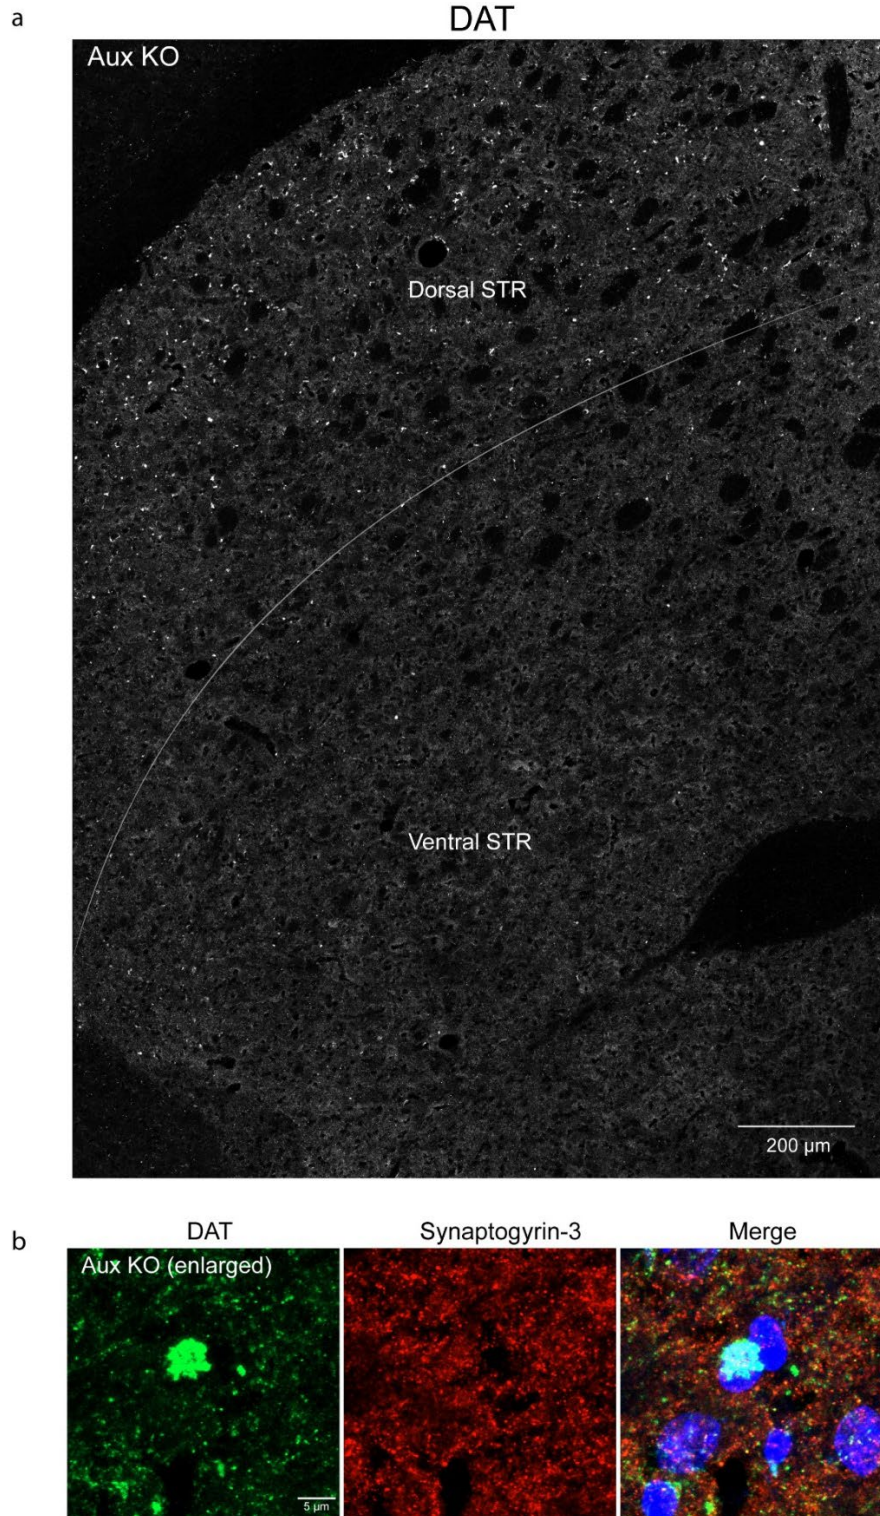

1103 **Supplementary Figure. 6: Large DAT+ structures in the dorsal striatum of auxilin KOs. a.**  
1104 Representative grayscale image of striatum of Aux KOs immunostained for DAT, showing large  
1105 DAT+ structures are enriched in the dorsolateral striatum (STR), but not in the ventral STR. Scale  
1106 bar: 200  $\mu$ m. **b.** Enlarged image of DAT+ve structures (green) in the dorsal striatum, co-  
1107 immunostained with synaptogyrin-3 (red). Scale bar: 5  $\mu$ m.

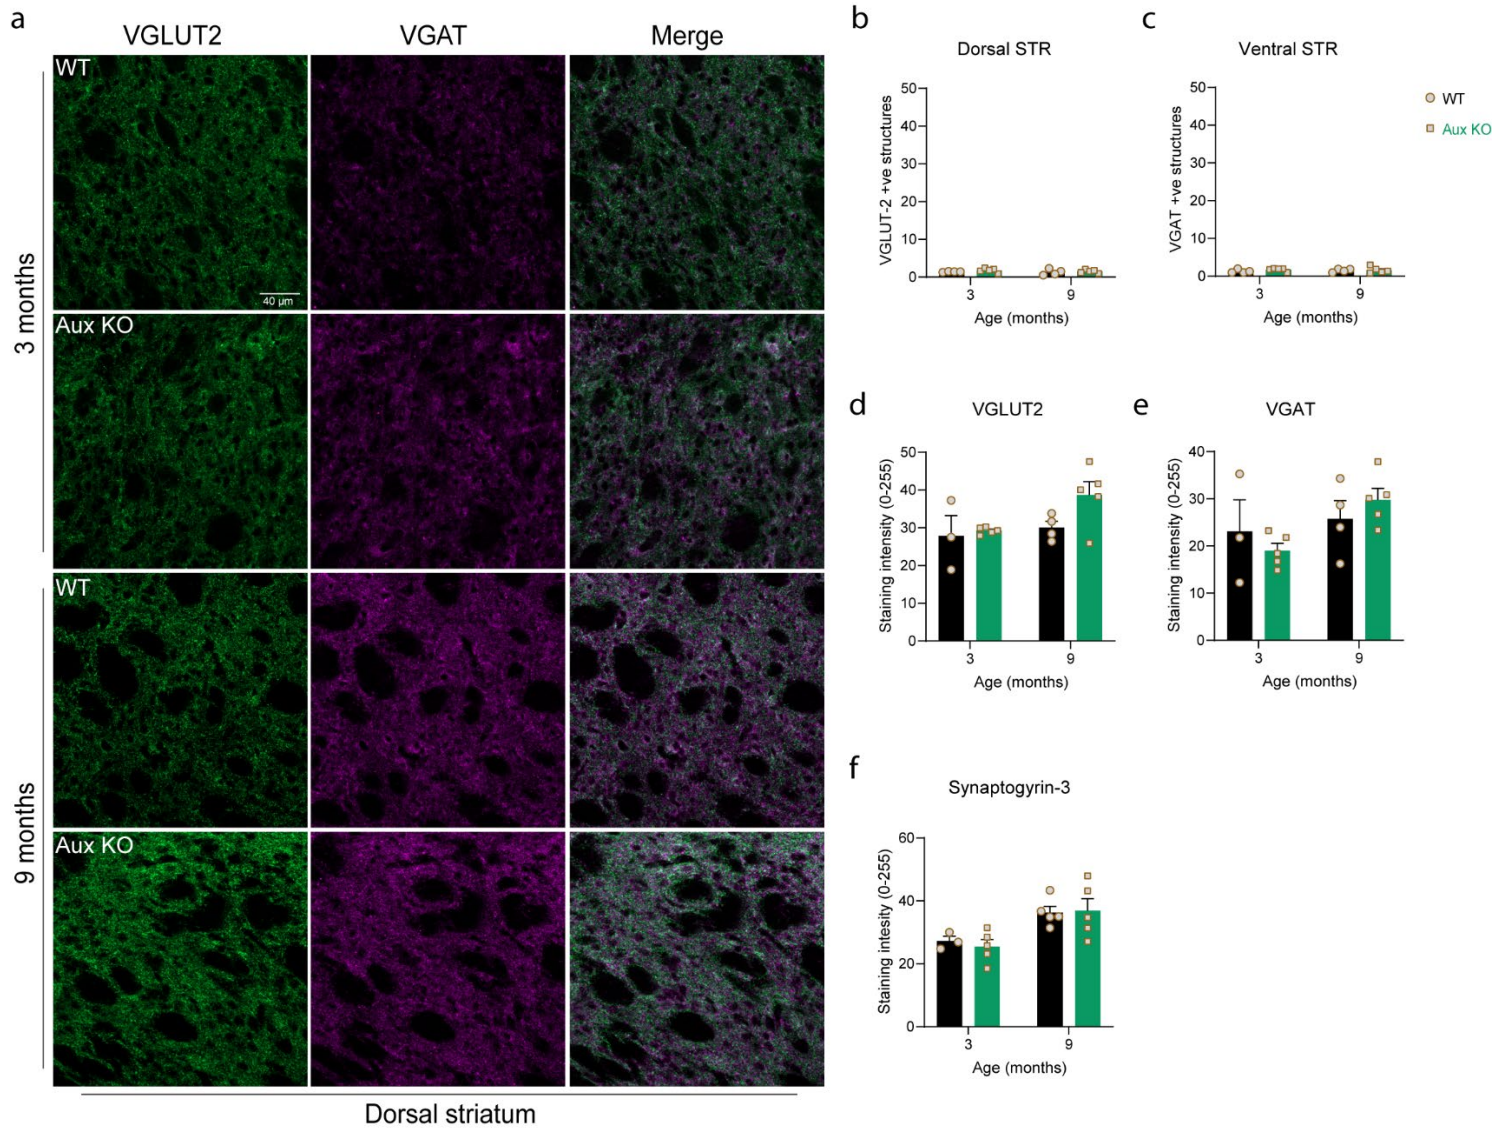

1109 **Supplementary Figure. 7: Axonal deformities were not seen in glutamatergic and**  
 1110 **GABAergic termini.** **a.** Representative images showing dorsal striatum immunostained for  
 1111 glutamatergic marker VGLUT2 and GABAergic marker VGAT, at 3 and 9 months of age, in WT  
 1112 and Aux KO mice. Scale bar: 40  $\mu$ m. **b.** Quantitation for VGLUT2+ve large structures/whirls in  
 1113 dorsal striatum of WT and Aux KO mice. We did not observe any differences between the two  
 1114 genotypes. **c.** Quantitation for VGAT+ve large structures in dorsal striatum of Aux KO mice which  
 1115 revealed no alterations. **d.** Expression of VGLUT2 in the dorsal striatum of WT and Aux KO mice  
 1116 at 3 and 9 months. **e.** Expression of VGAT in the dorsal striatum of WT and Aux KO mice at 3  
 1117 and 9 months, which did not alter in Aux KOs. **f.** Synaptogyrin-3 expression in the dorsal striatum  
 1118 of WT and Aux KO mice at 3 and 9 months, which was unaltered in Aux KOs (See Figure. 4 for  
 1119 representative images). Statistics: Student's t-test with Welch's correction.

1120

1121

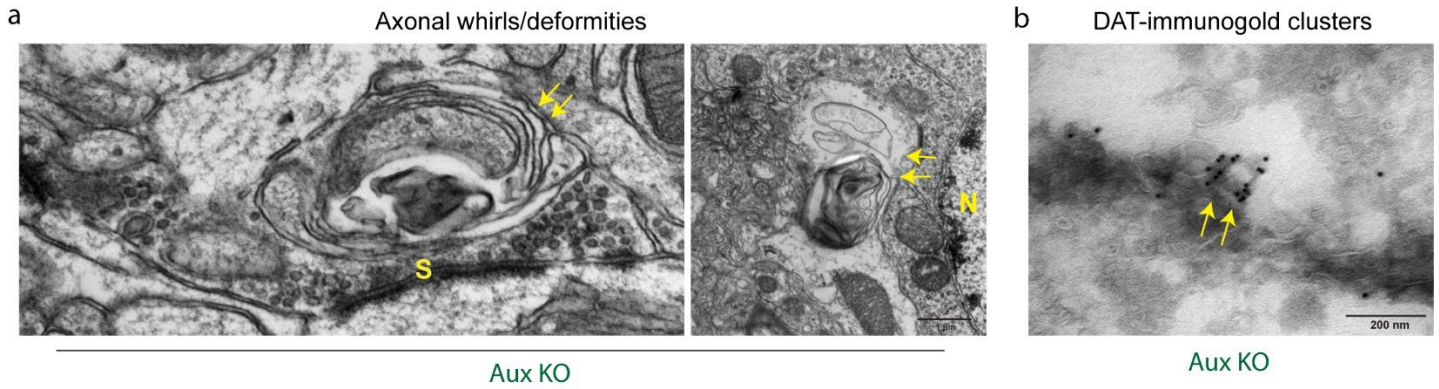

1123 **Supplementary Figure. 8: Auxilin KO mice show large axonal whirls/deformities in the**  
1124 **dorsal striatum. a.** Ultrastructure of axonal whirls/deformities in the dorsal striatum of Aux KO  
1125 mice (arrows). These structures were present both close to synaptic termini (S) and soma (as  
1126 identified by nucleus, N). Scale bar: 1  $\mu$ m. **b.** DAT-immunogold clusters in the dorsal striatum of  
1127 Aux KO mice (arrows). Scale bar: 200 nm.

1128

1129

1130



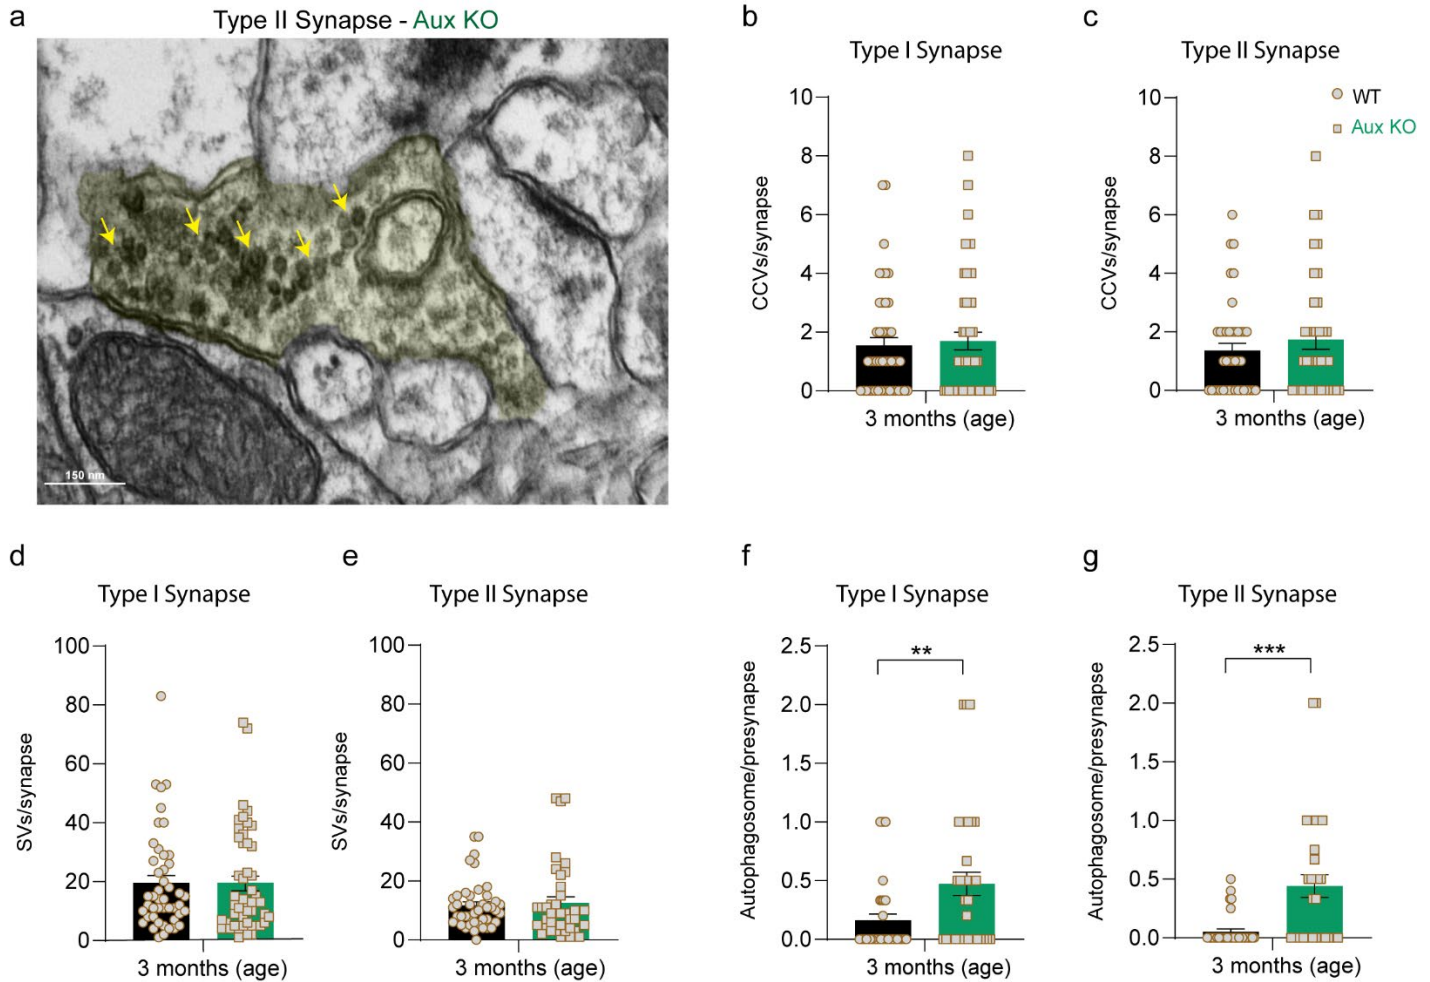

1132 **Supplementary Figure. 9: Synaptic autophagy clears accumulated CCVs.** **a.** Representative  
 1133 EM image of Aux KO Type I synapse (shaded in yellow) showing CCVs or clathrin cage  
 1134 accumulation, as well as SV clusters (arrows). Scale bar: 150  $\mu$ m. **b.** CCVs number in Type I  
 1135 synapses, which showed a minor increase in Aux KOs. **c.** CCVs number in Type II synapses,  
 1136 which showed a minor increase in Aux KO mice. **d.** SVs number in Type I synapses, which was  
 1137 not altered. **e.** SVs number in Type II synapses, which also did not change significantly in Aux  
 1138 KOs. **d.** Autophagosomes per presynaptic terminal in Type I synapses of dorsal striatum in WT  
 1139 and Aux KOs, which were significantly higher in Aux KOs. **e.** Autophagosomes per presynaptic  
 1140 terminal in Type II synapses, which were also increased significantly in Aux KO mice. Student's  
 1141 t-test with Welch's correction. \*\* $p < 0.01$ , \*\*\* $p < 0.001$

1142

1143

1144

1145

1146

1147 **Supplementary Table 1:** Proteins that are significantly changed in the proteomic analysis of  
 1148 brains of auxilin KO mice, in comparison to WT (age: 3 months).

| No. | Accession ID | Gene Name | Protein Name                                                            | fold change |
|-----|--------------|-----------|-------------------------------------------------------------------------|-------------|
| 1   | NNTM         | Nnt       | NAD(P)                                                                  | -29.7108    |
| 2   | AUXI         | Dnajc6    | Putative tyrosine protein phosphatase auxilin                           | -4.43618    |
| 3   | HEBP1        | Hebp1     | Heme-binding protein 1                                                  | -3.09322    |
| 4   | WDFY1        | Wdfy1     | WD repeat and FYVE domain-containing protein 1                          | -2.63747    |
| 5   | TBCD         | Tbcd      | Tubulin-specific chaperone D                                            | -2.05534    |
| 6   | AL7A1        | Aldh7a1   | Alpha-aminoacidic semialdehyde dehydrogenase                            | -1.77566    |
| 7   | ACAP2        | Acap2     | Arf-GAP with coiled-coil, ANK repeat and PH domain-containing protein 2 | -1.55571    |
| 8   | RAB3B        | Rab3b     | Ras-related protein Rab-3B                                              | -1.5479     |
| 9   | NLGN4        | Nlgn4l    | Neuroigin 4-like                                                        | 1.531757    |
| 10  | NMRL1        | Nmral1    | NmrA-like family domain-containing protein 1                            | 1.551981    |
| 11  | ODBA         | Bckdha    | 2-oxoisovalerate dehydrogenase subunit alpha                            | 1.56953     |
| 12  | PACS2        | Pacs2     | Phosphofurin acidic cluster sorting protein 2                           | 1.575139    |
| 13  | PURG         | Purg      | Purine-rich element-binding protein gamma                               | 1.591686    |
| 14  | CRYAB        | Cryab     | Alpha-crystallin B chain                                                | 1.592596    |
| 15  | SPIR1        | Spire1    | Protein spire homolog 1                                                 | 1.804854    |
| 16  | SYPM         | Pars2     | Probable proline--tRNA ligase                                           | 1.916042    |
| 17  | PRIO         | Prnp      | Major prion protein                                                     | 2.101816    |
| 18  | GAK          | Gak       | Cyclin-G-associated kinase                                              | 2.335293    |
| 19  | ZNRD2        | Znrd2     | Protein ZNRD2                                                           | 2.57939     |
| 20  | MTND         | Adi1      | 1,2-dihydroxy-3-keto-5-methylthiopentene dioxygenase                    | 2.843007    |
| 21  | IGG2B        | Igh-3     | Ig gamma-2B chain C region                                              | 3.601283    |
| 22  | PURA2        | Adss2     | Adenylosuccinate synthetase isozyme 2                                   | 4.116065    |

1149

1150

1151

1152

1153

1154

1155

1156

1157

1158 **Supplementary Table 2:** Proteins that are significantly changed in the proteomic analysis of  
 1159 synaptosomes prepared from the brains of auxilin KO mice, in comparison to WT (age: 3 months).

| No. | Accession | Gene Name  | Protein Name                                                           | fold change |
|-----|-----------|------------|------------------------------------------------------------------------|-------------|
| 1   | AUXI      | Dnajc6     | Putative tyrosine-protein phosphatase auxilin                          | -5.93229    |
| 2   | NNTM      | Nnt        | NAD(P) transhydrogenase                                                | -3.37721    |
| 3   | HEBP1     | Hebp1      | Heme-binding protein 1                                                 | -3.2288     |
| 4   | GBRA2     | Gabra2     | Gamma-aminobutyric acid receptor subunit alpha-2                       | -2.5017     |
| 5   | WDFY1     | Wdfy1      | WD repeat and FYVE domain-containing protein 1                         | -2.19771    |
| 6   | APC       | Apc        | Adenomatous polyposis coli protein                                     | -1.70123    |
| 7   | KCNJ4     | Kcnj4      | Inward rectifier potassium channel 4                                   | -1.60661    |
| 8   | COMT      | Comt       | Catechol O-methyltransferase                                           | -1.59569    |
| 9   | AL7A1     | Aldh7a1    | Alpha-aminoadipic semialdehyde dehydrogenase                           | -1.56755    |
| 10  | IVD       | Ivd        | Isovaleryl-CoA dehydrogenaseIvd, mitochondrial                         | -1.53054    |
| 11  | HTRA1     | Htra1      | Serine protease HTRA1                                                  | 1.518369    |
| 12  | CBPM      | Cpm        | Carboxypeptidase M                                                     | 1.520221    |
| 13  | NFH       | Nefh       | Neurofilament heavy polypeptide                                        | 1.533002    |
| 14  | IMDH2     | Impdh2     | Inosine-5'-monophosphate dehydrogenase 2                               | 1.573405    |
| 15  | THS7A     | Thsd7a     | Thrombospondin type-1 domain-containing protein 7A                     | 1.573839    |
| 16  | AINX      | Ina        | Alpha-internexin                                                       | 1.57441     |
| 17  | NFL       | Nefl       | Neurofilament light polypeptide                                        | 1.59067     |
| 18  | AP1S1     | Ap1s1      | AP-1 complex subunit sigma-1A                                          | 1.618179    |
| 19  | SCN1A     | Scn1a      | Sodium channel protein type 1                                          | 1.636414    |
| 20  | CH082     | <i>N/A</i> | UPF0598 protein C8orf82 homolog                                        | 1.726623    |
| 21  | PP2AB     | Ppp2cb     | Serine/threonine-protein phosphatase 2A catalytic subunit beta isoform | 1.789953    |
| 22  | PURA2     | Adss2      | Adenylosuccinate synthetase isozyme 2                                  | 2.577984    |
| 23  | S61A2     | Sec61a2    | Protein transport protein Sec61 subunit alpha isoform 2                | 2.644442    |
| 24  | MTND      | Adi1       | 1,2-dihydroxy-3-keto-5-methylthiopentene dioxygenase                   | 4.038564    |

1160

1161 **Supplementary Table 3:** Proteins that are significantly changed in the proteomic analysis of  
 1162 CCVs prepared from the brains of auxilin KO mice, in comparison to WT, at 3 months of age.

| No. | Accession | Gene Name | Protein Name                                  | fold change |
|-----|-----------|-----------|-----------------------------------------------|-------------|
| 1   | AUXI      | Dnajc6    | Putative tyrosine-protein phosphatase auxilin | -44.906     |
| 2   | IGHM      | IGHM      | Ig mu chain C region                          | -3.12027    |
| 3   | CD34      | Cd34      | Hematopoietic progenitor cell antigen CD34    | -2.50216    |
| 4   | NECP1     | Necap1    | Adaptin ear-binding coat-associated protein 1 | -2.35292    |
| 5   | SNG3      | Syng3     | Synaptogyrin-3                                | -2.10263    |
| 6   | HS71A     | Hspa1a    | Heat shock 70 kDa protein 1A                  | -2.02752    |
| 7   | SV2B      | Sv2b      | Synaptic vesicle glycoprotein 2B              | -1.9614     |
| 8   | SPRL1     | Sparcl1   | SPARC-like protein 1                          | -1.94395    |

|    |       |          |                                                           |          |
|----|-------|----------|-----------------------------------------------------------|----------|
| 9  | GRM2  | Grm2     | Metabotropic glutamate receptor 2                         | -1.9365  |
| 10 | IGKC  | Igkc     | Ig kappa chain C region                                   | -1.92748 |
| 11 | TM163 | Tmem163  | Transmembrane protein 163                                 | -1.92239 |
| 12 | TCPB  | Cct2     | T-complex protein 1 subunit beta                          | -1.8972  |
| 13 | SNG1  | Syng1    | Synaptogyrin-1                                            | -1.8946  |
| 14 | NECP2 | Necap2   | Adaptin ear-binding coat-associated protein 2             | -1.89401 |
| 15 | ROAA  | Hnrnpab  | Heterogeneous nuclear ribonucleoprotein A/B               | -1.86664 |
| 16 | RAB3B | Rab3b    | Ras-related protein Rab-3B                                | -1.85144 |
| 17 | VGLU1 | Slc17a7  | Vesicular glutamate transporter 1                         | -1.8164  |
| 18 | TRFE  | Tf       | Serotransferrin                                           | -1.80762 |
| 19 | LAT1  | Slc7a5   | Large neutral amino acids transporter small subunit 1     | -1.72256 |
| 20 | SYPH  | Syp      | Synaptophysin                                             | -1.71627 |
| 21 | SV2A  | Sv2a     | Synaptic vesicle glycoprotein 2A                          | -1.71423 |
| 22 | ROA0  | Hnrnpa0  | Heterogeneous nuclear ribonucleoprotein A0                | -1.70418 |
| 23 | ZNT3  | Slc30a3  | Zinc transporter 3                                        | -1.70291 |
| 24 | DPP10 | Dpp10    | Inactive dipeptidyl peptidase 10                          | -1.68897 |
| 25 | NTRI  | Ntm      | Neurotrimin                                               | -1.68091 |
| 26 | SYT12 | Syt12    | Synaptotagmin-12                                          | -1.67682 |
| 27 | IGLO5 | Igln5    | IgLON family member 5                                     | -1.668   |
| 28 | VGLU2 | Slc17a6  | Vesicular glutamate transporter 2                         | -1.66765 |
| 29 | SYT1  | Syt1     | Synaptotagmin-1                                           | -1.61913 |
| 30 | CAD13 | Cdh13    | Cadherin-13                                               | -1.58329 |
| 31 | BT3L4 | Btf3l4   | Transcription factor BTF3 homolog 4                       | -1.57599 |
| 32 | SCAM5 | Scamp5   | Secretory carrier-associated membrane protein 5           | -1.57105 |
| 33 | C1QB  | C1qb     | Complement C1q subcomponent subunit B                     | -1.55463 |
| 34 | STON2 | Ston2    | Stonin-2                                                  | -1.5433  |
| 35 | VAMP2 | Vamp2    | Vesicle-associated membrane protein 2                     | -1.52957 |
| 36 | MFSD6 | Mfsd6    | Major facilitator superfamily domain-containing protein 6 | -1.5266  |
| 37 | RAP1A | Rap1a    | Ras-related protein Rap-1A                                | -1.51838 |
| 38 | NHRF1 | Slc9a3r1 | Na(+)/H(+) exchange regulatory cofactor NHE-RF1           | -1.51157 |
| 39 | CC50A | Tmem30a  | Cell cycle control protein 50A                            | 1.511254 |
| 40 | TPC11 | Trappc11 | Trafficking protein particle complex subunit 11           | 1.588902 |
| 41 | MYPR  | Plp1     | Myelin proteolipid protein                                | 1.59174  |
| 42 | CLVS2 | Clvs2    | Clavesin-2 OS=Mus musculus                                | 1.642113 |
| 43 | MOG   | Mog      | Myelin-oligodendrocyte glycoprotein                       | 1.655013 |
| 44 | AP3M2 | Ap3m2    | AP-3 complex subunit mu-2                                 | 1.657988 |
| 45 | APMAP | Apmap    | Adipocyte plasma membrane-associated protein              | 1.727314 |
| 46 | TMM9B | Tmem9b   | Transmembrane protein 9B                                  | 1.738029 |
| 47 | H2A1B | H2ac4    | Histone H2A type 1-B                                      | 1.807098 |
| 48 | NDKA  | Nme1     | Nucleoside diphosphate kinase A                           | 1.808866 |
| 49 | PCYOX | Pcyox1   | Prenylcysteine oxidase                                    | 2.039561 |
| 50 | CLCN6 | Clcn6    | Chloride transport protein 6                              | 2.169131 |
| 51 | ERC2  | Erc2     | ERC protein 2                                             | 6.374011 |

1163 **Supplementary Table 4:** Proteins that are significantly changed in the proteomic analysis of  
 1164 synaptosomes prepared from the brains of auxilin KO mice, in comparison to WT, at symptomatic  
 1165 age of 9 months.

| No. | Accession | Gene Name | Protein Name                                                   | fold change |
|-----|-----------|-----------|----------------------------------------------------------------|-------------|
| 1   | AUXI      | Dnajc6    | Putative tyrosine-protein phosphatase auxilin                  | -3.82296    |
| 2   | RGS6      | Rgs6      | Regulator of G-protein signaling 6                             | -1.66333    |
| 3   | ADA22     | Adam22    | Disintegrin and metalloproteinase domain-containing protein 22 | -1.61876    |
| 4   | ADT1      | Slc25a4   | ADP/ATP translocase 1                                          | -1.59798    |
| 5   | 2AAB      | Ppp2r1b   | Serine/threonine-protein phosphatase 2A                        | -1.57516    |
| 6   | 2AAA      | Ppp2r1a   | Serine/threonine-protein phosphatase 2A                        | -1.54334    |
| 7   | PADI2     | Padi2     | Protein-arginine deiminase type-2                              | -1.53356    |
| 8   | PRAF3     | Arl6ip5   | PRA1 family protein 3                                          | -1.52679    |
| 9   | MGLL      | Mgll      | Monoglyceride lipase                                           | -1.51729    |
| 10  | MTOR      | Mtor      | Serine/threonine-protein kinase mTOR                           | -1.50276    |
| 11  | CRIP2     | Crip2     | Cysteine-rich protein 2                                        | 1.543321    |
| 12  | NFL       | Nefl      | Neurofilament light polypeptide                                | 1.545559    |
| 13  | AINX      | Ina       | Alpha-internexin                                               | 1.557636    |
| 14  | CADH2     | Cdh2      | Cadherin-2                                                     | 2.225312    |
| 15  | ABLM2     | Ablim2    | Actin-binding LIM protein 2                                    | 1.631285    |
| 16  | ACTN1     | Actn1     | Alpha-actinin-1                                                | 1.5648206   |
| 17  | GAK       | GAK       | Cyclin-G-associated kinase                                     | 1.4910263   |

1166
